# Supplementary material for: IMiQ: a novel protein quality control compartment protecting mitochondrial functional integrity
Source: PubMed Central journal article supplement — Mol Biol Cell. 2018 Feb 1;29(3):256–69. doi: 10.1091/mbc.E17-01-0027 (PMC5996957; doi:10.1091/mbc.e17-01-0027), 2018-02-01
Supplement: mbc-29-256-s001.pdf [file mbc-29-256-s001.pdf]

# Supplemental Materials

*Molecular Biology of the Cell*

Bruderek et al.

Table S1: *Plasmids used in this study*

| Plasmid                        | Description                                                                                             | Reference                      |
|--------------------------------|---------------------------------------------------------------------------------------------------------|--------------------------------|
| pBG8099                        | pYEDP1/8-2 harboring <i>cytb<sub>2</sub>(84)<sub>Δ</sub></i> -GFP under Gal promoter                    | Bernard Guiard                 |
| pMB028                         | pYEDP1/8-2 harboring <i>cytb<sub>2</sub>(84)<sub>Δ</sub></i> -GFP-DHFR <sub>ds</sub> under Gal promoter | This study                     |
| pMB029                         | pYEDP1/8-2 harboring GFP-DHFR <sub>ds</sub> under Gal promoter                                          | This study                     |
| pMB031                         | removed insert in pYEDP1/8-2 (empty vector)                                                             | This study                     |
| pMB032                         | pYEDP1/8-2 harboring <i>cytb<sub>2</sub>(84)<sub>Δ</sub></i> -GFP-DHFR under Gal promoter               | This study                     |
| pMB034                         | pUG35 harboring <i>cytb<sub>2</sub>(167)<sub>Δ</sub></i> -mCherry under Met <sub>25</sub> promoter      | This study                     |
| pTB10                          | pRS315 encoding <i>HSP78</i> under own promoter                                                         | This study                     |
| pRS314- <i>NUP120</i> -mCherry | pRS314 harboring <i>Nup120</i> -mCherry                                                                 | (Skruzny <i>et al.</i> , 2009) |
| pWJ09                          | pRS314 encoding <i>FIS1</i> under own promoter                                                          | This study                     |

Table S2: *Yeast strains used in this study*

| Strain                          | Genotype                                                                                                              | Source                         |
|---------------------------------|-----------------------------------------------------------------------------------------------------------------------|--------------------------------|
| WVY49 (WT)                      | MAT $\alpha$ □□□□□□□□ lys2 ura3-52 leu2-3 112 trp1                                                                    | Wolfgang Voos                  |
| BY4741                          | MAT $\alpha$ his3 $\Delta$ 1 leu2 $\Delta$ 0, met15 $\Delta$ 0 ura3 $\Delta$ 0                                        | Euroscarf                      |
| BY4741 rho-                     | MAT $\alpha$ his3 $\Delta$ 1 leu2 $\Delta$ 0, met15 $\Delta$ 0 ura3 $\Delta$ 0                                        | Euroscarf                      |
| <i>ssc1-3</i>                   | MAT $\alpha$ □□□□□□□□ lys2 ura3-52 leu2-3 112 trp1 <i>ssc1-3</i> (LEU2)                                               | (Gambill <i>et al.</i> , 1993) |
| <i>mdj1<math>\Delta</math></i>  | MAT $\alpha$ his3 $\Delta$ 1 leu2 $\Delta$ 0, met15 $\Delta$ 0 ura3 $\Delta$ 0 <i>mdj1<math>\Delta</math>::KanMX</i>  | Euroscarf                      |
| <i>hsp78<math>\Delta</math></i> | MAT $\alpha$ his3 $\Delta$ 1 leu2 $\Delta$ 0, met15 $\Delta$ 0 ura3 $\Delta$ 0 <i>hsp78<math>\Delta</math>::KanMX</i> | Euroscarf                      |
| <i>fzo1<math>\Delta</math></i>  | MAT $\alpha$ his3 $\Delta$ 1 leu2 $\Delta$ 0, met15 $\Delta$ 0 ura3 $\Delta$ 0 <i>fzo1<math>\Delta</math>::KanMX</i>  | Euroscarf                      |
| <i>fis1<math>\Delta</math></i>  | MAT $\alpha$ his3 $\Delta$ 1 leu2 $\Delta$ 0, met15 $\Delta$ 0 ura3 $\Delta$ 0 <i>fis1<math>\Delta</math>::KanMX</i>  | Euroscarf                      |

Michael Bruderek *et al.*,

“IMiQ: a novel protein quality control compartment protecting mitochondrial functional integrity”

## Supplemental experimental procedures

### ***Immunofluorescence microscopy***

Cells were fixed in selective medium with 3% glycerol and 12 % formaldehyde. Cells were resuspended in paraformaldehyde buffer (100mM KH<sub>2</sub>PO<sub>4</sub>, 4 % paraformaldehyde, 45 mM NaOH) and incubated over night. Cell walls were digested by spheroplasts solution (1.2 M sorbitol, 50 mM KP<sub>i</sub>, pH 7.4, 1 mM MgCl<sub>2</sub>, and 3 mg/ml zymolyase 20T) and lysed by 5 % SDS. Fixed cells were settled on microscope slides and incubated with primary antibodies over night. Finally, cells were incubated with secondary antibodies (Cy3 a-rabbit IgG and Alexa 488 a-mouse IgG, Thermo Scientific, DE) and embedded by Roti-Mount FluoreCare DAPI (Roth, DE).

### ***Import and degradation of radiolabeled preproteins in isolated mitochondria***

Mitochondria were isolated from *S. cerevisiae* cells by standard procedures (Diekert *et al.*, 2001). Preprotein import into isolated mitochondria was performed as published (Ryan *et al.*, 2001). In brief, radiolabeled preprotein Su9(70)-DHFR was synthesized by *in vitro* transcription and translation in presence of [<sup>35</sup>S]-methionine/cysteine using rabbit reticulocyte lysate (Promega, DE). For import reactions, isolated mitochondria were incubated in import buffer (250 mM sucrose, 10 mM MOPS/KOH pH 7.2, 80 mM KCl, 5 mM MgCl<sub>2</sub>, 3% w/v BSA, 2 mM ATP, 2 mM NADH, 50 μM MnCl, 10 μM ZnCl) in presence or absence of a mitochondrial membrane potential ( $\Delta\psi$ ). Import was triggered by addition of radiolabeled preprotein and incubation at 30 °C. After stopping the reaction on ice, non-imported preproteins were digested by proteinase K (PK) treatment. Subsequently, mitochondria were reisolated and analyzed by SDS-PAGE and digital autoradiography.

### ***Mitochondrial membrane potential measurement***

After expression of aggregate reporter proteins for 10 h as described above, 20 OD<sub>600</sub> units of cells were collected, resuspended in Te $\beta$ -buffer (200 mM Tris/HCl pH 8, 20 mM EDTA pH 8,  $\beta$ -mercaptoethanol) and incubated for 10 min at 30 °C. Cells were resuspended in spheroblast solution (1.2 M sorbitol, 50 mM KP<sub>i</sub> pH 7.2, 1 mM MgCl<sub>2</sub>) containing 3 mg/ml zymolyase and incubated for 30 min at 30 °C. Spheroblasts were washed twice with 1.2 M sorbitol and resuspended in storage buffer (250 mM sucrose, 10 mM MOPS/KOH pH 7.2, 80 mM KCl, 5 mM MgCl<sub>2</sub>, 3% w/v BSA, 2 mM ATP, 2 mM NADH). For measurements, potential buffer (0.6 M sorbitol, 20 mM KP<sub>i</sub> pH 7.2, 0.1% w/v BSA, 0.5 mM EDTA, pH 8) containing 5 mM L-malate and 5 mM L-glutamate was added. Potential-dependent fluorescence was measured by addition of 0.25 μM 3,3'-Dipropylthiadicarbocyanine iodide (DiSC<sub>3</sub>). The mitochondrial potential was depleted by addition of 20 mM sodium azide causing a recovery of DiSC<sub>3</sub> fluorescence, used as experimental read out.

### ***2-D PAGE***

For 2D PAGE analysis of co-sedimentation upon mtGFP-DHFR<sub>ds</sub> expression, 1 mg mitochondria were resuspended in lysis buffer (0.5% Triton X-100, 50 mM KP<sub>i</sub> pH 7.2, 10 mM DTT, 1 mM EDTA, 1x protease inhibitor (Roth, DE), 1 mM PMSF) and lysed by pipetting (20x) and shaking for 10 min at 4 °C. Lysed mitochondria were centrifuged at high speed (20000 xg) at 4°C and pellet was washed in wash buffer + triton X-100 (0.5% triton X-100, 20 mM KP<sub>i</sub> pH 7.2, 1 mM PMSF) and subsequently washed again in wash buffer (20 mM KP<sub>i</sub> pH 7.2, 1 mM PMSF). After reisolation, pellet was resuspended in rehydration buffer (7 M urea, 2 M thio-urea, 2% w/v CHAPS, 20 mM DTT, 0.8% v/v Pharmalyte (Biolytes) 3-10 NL, small amount of Bromophenol Blue) and was shaken vigorously at 20 °C for 10 min. For first-dimension IEF, sample was applied to dry 18 cm non-linear, pH 3 to 11 immobiline strips (GE Healthcare, UK), respectively, for overnight in-gel rehydration at 20°C in the dark in an IPGphor isoelectric focusing system (GE Healthcare, UK). Subsequently to re-swelling,

protein focusing was performed in stepwise increase of voltage (1 h 200 V, 1 h 500 V and 1 h 1000 V). Finally, the voltage was increased to 8000 V (slow increase over 2 h and 30 min) for 3 h and subsequently decreased to 500 V for 2 h and 30 min. Focused strip was equilibrated and reduced stepwise for 10 min, respectively in equilibration buffer (6 M urea, 1.5 mM Tris/HCl pH 8.8, 50 % v/v glycerol, 1 % w/v SDS) containing either 1 % w/v DTT or 2.5 % w/v iodoacetamide in the dark. Proteins were separated by SDS-PAGE on 11 % polyacrylamide gel at 0.5 W per gel for 1 hour and subsequently at 1.5 W per gel over night at 20 °C in an Ettan™ DALTSix system (GE Healthcare, UK). Protein detection was performed by gel fixation using fixation solution (40 % v/v methanol, 10 % v/v acetic acid) for 2 hours following staining using Coomassie Blue G250 (40 % v/v methanol, 10 % v/v acetic acid, 0.5 % w/v Coomassie Blue G250).

### **Peptide preparation and LC-MS**

Gel slices were excised and subjected to tryptic in gel digestion (Rosenfeld *et al.*, 1992). In brief, slices were washed consecutively with water, 50 % acetonitrile (ACN), and 100 % ACN. Proteins were reduced with 20 mM DTT in 50 mM ammonium bicarbonate and alkylated with 40 mM iodoacetamide (in 50 mM bicarbonate). The slices were washed again and dehydrated with ACN. Dried slices were incubated with 400 ng sequencing grade trypsin at 37 °C overnight. The peptide extract was separated and remaining peptides extracted with 50 % ACN. Peptides were dried in a vacuum concentrator and stored at -20 °C.

Peptides were dissolved in 8 µl 0.1 % trifluoroacetic acid. 1 to 2 µl were injected onto a C18 trap column (20 mm length, 100 µm inner diameter) coupled to a C18 analytical column (200 mm length, 75 µm inner diameter), made in house with 3 µm ReproSil-Pur 120 C18-AQ particles (Dr. Maisch, Ammerbuch, DE). Solvent A was 0.1 % formic acid. Peptides were separated during a linear gradient from 0 % to 35% solvent B (90% ACN, 0.1% formic acid) within 30 or 45 min at a flow rate of 350 nl/min. The nanoHPLC was coupled online to an LTQ Orbitrap Velos mass spectrometer (Thermo Fisher Scientific, DE) or an HCT Ultra ion trap mass spectrometer (Bruker Daltonik, DE). For Orbitrap analyses peptide ions between 330 and 1700 m/z were scanned in the Orbitrap detector with a resolution of 30,000 (maximum fill time 400 ms, AGC target 10<sup>6</sup>). The 25 most intense precursor ions (threshold intensity 5000) were subjected to collision induced dissociation and fragments analyzed in the linear ion trap. Fragmented peptide ions were excluded from repeat analysis for 15 s. Raw data processing and analysis of database searches were performed with Proteome Discoverer software 1.4.1.12 (Thermo Fisher Scientific). Peptide identification was done with an in house Mascot server version 2.4.1 (Matrix Science Ltd, London, UK). MS2 data were searched against *S. cerevisiae* and human sequences from SwissProt (release 2013\_03). Precursor Ion m/z tolerance was 10 ppm, fragment ion tolerance 0.6 Da. Tryptic peptides were searched with up to two missed cleavages. Low scoring spectrum matches were searched again with semitryptic specificity with up to one missed cleavage. Carbamidomethylation was set as a static modification (Cys). Oxidation (Met) and acetylation (protein N-terminus) were set as dynamic modifications. Mascot results from searches against SwissProt were sent to the percolator algorithm (Käll *et al.*, 2008) version 2.04 as implemented in Proteome Discoverer. Only proteins with two peptides (maximum posterior error probability 1 %) were considered and identified. HCT Ultra ion trap ENREF 4 data were processed in ESI Compass 1.3 DataAnalysis Version 4.0 (Bruker). Mascot server searches were started from ProteinScape 3.0 against *S. cerevisiae* and human sequences from SwissProt with precursor and fragment ion tolerances of 0.6 Da and modification settings as above.

## **Supplemental references**

Diekert, K., de Kroon, A.I., Kispal, G., and Lill, R. (2001). Isolation and subfractionation of mitochondria from the yeast *Saccharomyces cerevisiae*. *Methods Cell Biol.* 65, 37-51.

- Käll, L., Storey, J.D., MacCoss, M.J., and Noble, W.S. (2008). Assigning significance to peptides identified by tandem mass spectrometry using decoy databases. *J. Proteome Res.* 7, 29-34.
- Rosenfeld, J., Capdevielle, J., Guillemot, J.C., and Ferrara, P. (1992). In-gel digestion of proteins for internal sequence analysis after one- or two-dimensional gel electrophoresis. *Anal. Biochem.* 203, 173-179.
- Ryan, M.T., Voos, W., and Pfanner, N. (2001). Assaying protein import into mitochondria. *Methods Cell Biol.* 65, 189-215.

## Supplemental figure legends

### Figure S1. Immunofluorescence analysis of mitochondrial protein aggregation

- A) Immunofluorescence of wt yeast cells expressing the aggregation reporter proteins *mtGFP-DHFR* and *mtGFP-DHFR<sub>ds</sub>* as indicated after 5 h of induction with galactose. Cells were fixed and incubated with antisera against GFP (green) and Ssc1 (red) as described in "Supplemental experimental procedures". Nuclei were visualized by staining with DAPI (blue). IMiQ structures are indicated by white arrows. Scale bar: 5  $\mu$ m.
- B) Immunofluorescence of wt yeast cells upon incubation at 42 °C (hs) for indicated time points. Mitochondrial protein Atp2 (green) was detected by immunostaining and nuclei were visualized by staining with DAPI (blue). Scale bar: 10  $\mu$ m.
- C) Aggregation behavior of Atp2 in heat stressed cells. Cells were incubated at 42 °C (hs) for the indicated times. Total cell extracts (T), supernatants (S) and aggregate pellet fractions after 20,000 xg centrifugation (P, 2 x amounts) were applied to SDS-PAGE and analyzed by Western blot using antibodies against Atp2. Mdh1 was used as soluble control protein of the mitochondrial matrix.

### Figure S2. Aggregation behavior of destabilized reporter proteins

- A) Expression of destabilized reporter and control proteins for the indicated times. Protein levels were analyzed by Western blot and immunodecoration with antibodies against GFP. The cytosolic protein Pgk1 was detected as loading control.
- B) Differential centrifugation of wild type yeast cells expressing destabilized reporter protein or control proteins. Cells expressing the indicated reporter proteins for 10 h were lysed and pellet fractions (3x amounts) after centrifugation at 2,000 xg ( $P_2$ ), 20,000 xg ( $P_{20}$ ), and 125,000 xg ( $P_{125}$ ) were analyzed by SDS-PAGE and Western blot as described in Fig. 2B. Total protein content is indicated by the respective Coomassie-stained blot membrane sections. (T, total cell extract; S, supernatant of 125,000 xg centrifugation).
- C) Co-aggregation of endogenous proteins within the mitochondrial matrix. Cells expressing the indicated reporter proteins for 10 h were lysed and centrifuged at 20,000xg. Supernatant (S) and pellet fractions (P, 3x amounts) were analyzed by SDS-PAGE and Western blot using antibodies against the indicated proteins.
- D) Co-aggregation of mitochondrial PQC system components. Wild type yeast cells expressing reporter proteins for 24 h were lysed and centrifuged at 20,000 xg. Total cell extracts (T), supernatants (S) and pellet fractions (P, 3x amounts) were analyzed by Western blot using antibodies against GFP and the indicated mitochondrial PQC components.

### Figure S3. 2D-PAGE analysis of co-sedimenting mitochondrial proteins in presence of *mtGFP-DHFR<sub>ds</sub>*.

Mitochondria isolated from wild type yeast cells expressing the destabilized reporter protein *mtGFP-DHFR<sub>ds</sub>* were lysed and centrifuged at 20,000 xg. The pellet fraction was analyzed by 2D-PAGE as described in Experimental procedures. Proteins in a range between 20-140 kDa and pI 3-11 are shown. Protein spots identified by LC-MS are listed. Indicated are protein name, subcellular or submitochondrial localization (according to SGD; *Saccharomyces genome database*), molecular weight and pI of the mature protein, number

of peptides found in LC-MS, and functional description. \* Molecular weight and pI of full-length protein (transit peptide not known).

**Figure S4. Mitochondrial quality and functionality are maintained in cells containing IMiQ aggregate deposits.**

A) Determination of mitochondrial membrane potential ( $\Delta\psi$ ). Spheroblasts were prepared from cells expressing destabilized or control proteins for 10 h and analyzed using DiSC<sub>3</sub> fluorescence as described.

B) *In vitro* import of cytosolic precursor proteins. Radiolabeled Su9(70)-DHFR was imported for indicated time points into isolated and energized mitochondria containing *mtGFP-DHFR<sub>ds</sub>* or control proteins (10 h expression) as described. Where indicated, the mitochondrial membrane potential was abolished by addition of 8  $\mu$ M antimycin A, 0.5  $\mu$ M valinomycin and 2  $\mu$ M oligomycin ( $-\Delta\psi$ ). Import reactions were analyzed by SDS-PAGE and digital autoradiography.

C) Analysis of mitochondrial protein complex integrity in isolated mitochondria containing destabilized reporter proteins. Mitochondria isolated from yeast cells were lysed by 0.05% digitonin and analyzed either by 10 % or 12% BN-PAGE and Western blot. Protein components of mitochondrial complexes located in the outer membrane (Tom40; TOM translocase complex), inner membrane (Cox4; respiratory complex IV) or mitochondrial matrix (Atp2; F-ATPase complex and Kgd1; ketoglutarate dehydrogenase complex) were detected by the respective antibodies. As loading controls, samples of lysed isolated mitochondria were applied to SDS-Page and proteins were detected by Western blot.

**Figure S5. Phenotype complementation of yeast mutant cells.**

A) Growth rates of *fis1* $\Delta$  yeast cells expressing the destabilized *mtGFP-DHFR<sub>ds</sub>* fusion protein. Control strains were transfected with single copy plasmid pWJ09 that encoded the full length *FIS1* gene under its own promoter. After galactose induction for 10 h, cells from the indicated mutant strains were spotted on selective plates containing fermentable (2 % glucose) or non-fermentable carbon source (3 % glycerol) and incubated at 30 or 37 °C to assess mitochondrial function.

B) Growth rates of *hsp78* $\Delta$  yeast cells expressing the destabilized *mtGFP-DHFR<sub>ds</sub>* fusion protein. Control strains were transfected with single copy plasmid pTB10 that encoded the full length *HSP78* gene under its own promoter. After galactose induction for 10 h, cells from the indicated mutant strains were subjected to a short heat shock and recovery as indicated in Fig. 6C. Cells were then incubated at a lethal temperature of 50 °C for 1 h and spotted on selective plates containing 2 % glucose.

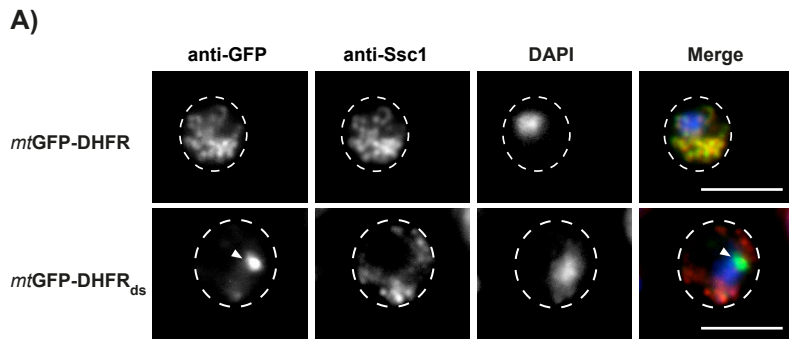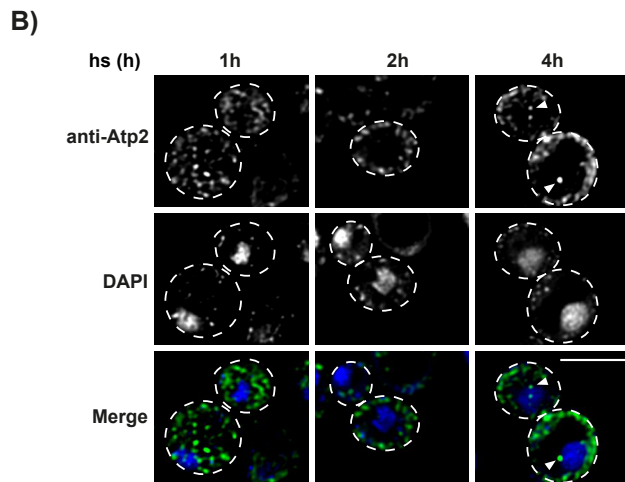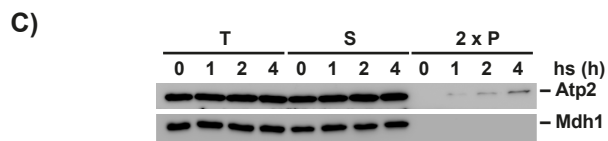

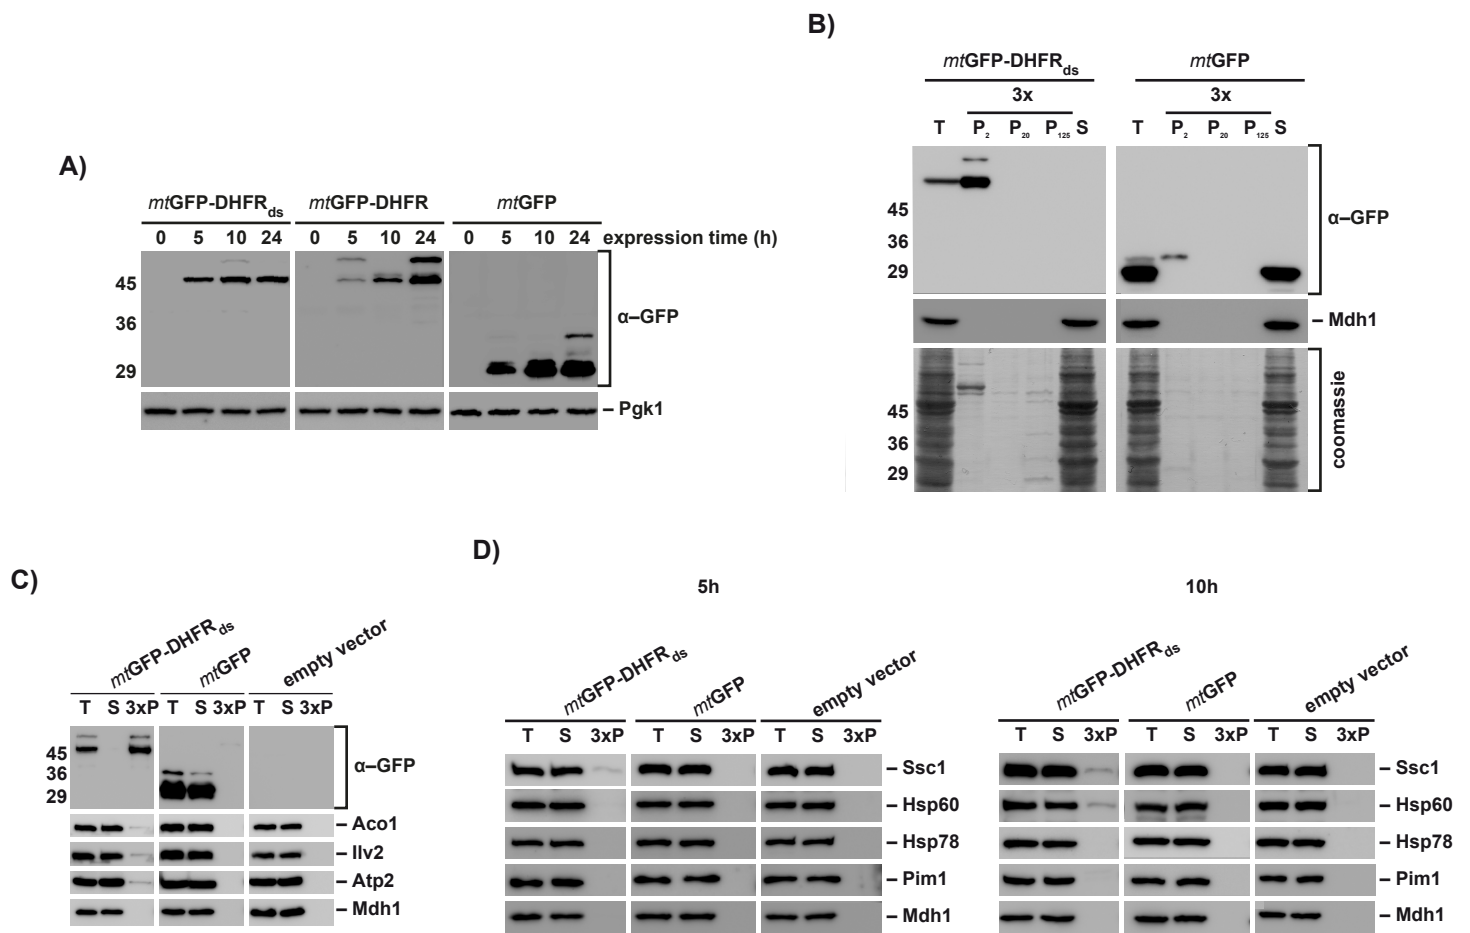



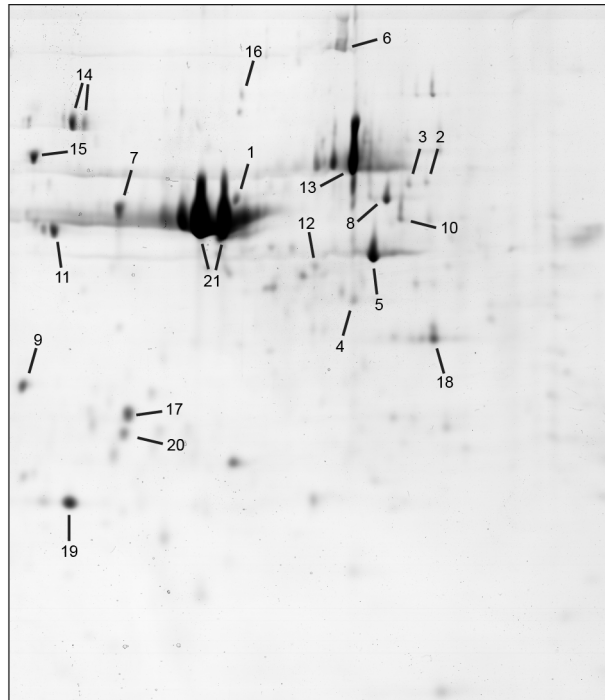

| Number | Name  | Description <sup>a)</sup> | Localisation <sup>b)</sup> | MW [kDa] <sup>c)</sup> | pi <sup>d)</sup> |
|--------|-------|---------------------------|----------------------------|------------------------|------------------|
| 1      | Ald4  | Amino acid biosynthesis   | Matrix                     | 53,9                   | 5,9              |
| 2      | Iiv1  | Amino acid biosynthesis   | Matrix                     | 63,8 *                 | 9,3 *            |
| 3      | Iiv3  | Amino acid biosynthesis   | Matrix                     | 62,8 *                 | 8,8 *            |
| 4      | Iiv5  | Amino acid biosynthesis   | Matrix                     | 39,1                   | 6,7              |
| 5      | Cit1  | TCA cycle                 | Matrix                     | 49,1                   | 7,0              |
| 6      | Kgd1  | TCA cycle                 | Matrix                     | 110,9                  | 6,8              |
| 7      | Kgd2  | TCA cycle                 | Matrix                     | 50,4 *                 | 9,4 *            |
| 8      | Lpd1  | TCA cycle                 | Matrix                     | 51,5                   | 7,0              |
| 9      | Pdb1  | TCA cycle                 | Matrix                     | 36,4                   | 4,5              |
| 10     | Atp1  | electron transport chain  | Inner membrane             | 51,6                   | 7,7              |
| 11     | Atp2  | electron transport chain  | Inner membrane             | 51,0                   | 4,8              |
| 12     | Cor1  | electron transport chain  | Inner membrane             | 47,3                   | 6,3              |
| 13     | Cyb2  | electron transport chain  | Inner membrane space       | 56,5                   | 6,5              |
| 14     | SSC1  | Mitochondrial chaperone   | Matrix                     | 68,0                   | 5,0              |
| 15     | Hsp60 | Mitochondrial chaperone   | Matrix                     | 57,7                   | 4,6              |
| 16     | Mef1  | Mitochondrial translation | Matrix                     | 79,6                   | 5,9              |
| 17     | Pil1  |                           | Lipid droplet              | 38,3                   | 4,4              |
| 18     | Gal7  |                           | Cytosol                    | 42,7                   | 7,9              |
| 19     | Hsp26 |                           | Cytosol                    | 23,9                   | 5,2              |
| 20     | Lsp1  |                           | Cytosol                    | 38,0                   | 4,5              |
| 21     | GFP   |                           |                            | 26,9                   | 5,6              |

A)

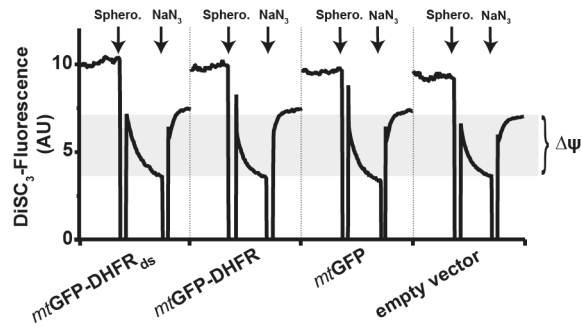

B)

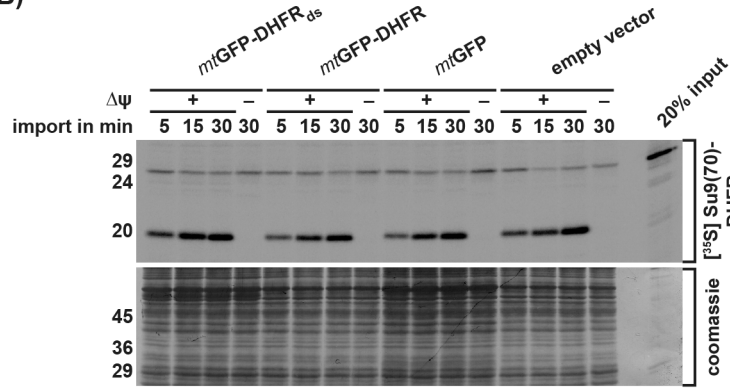

C)

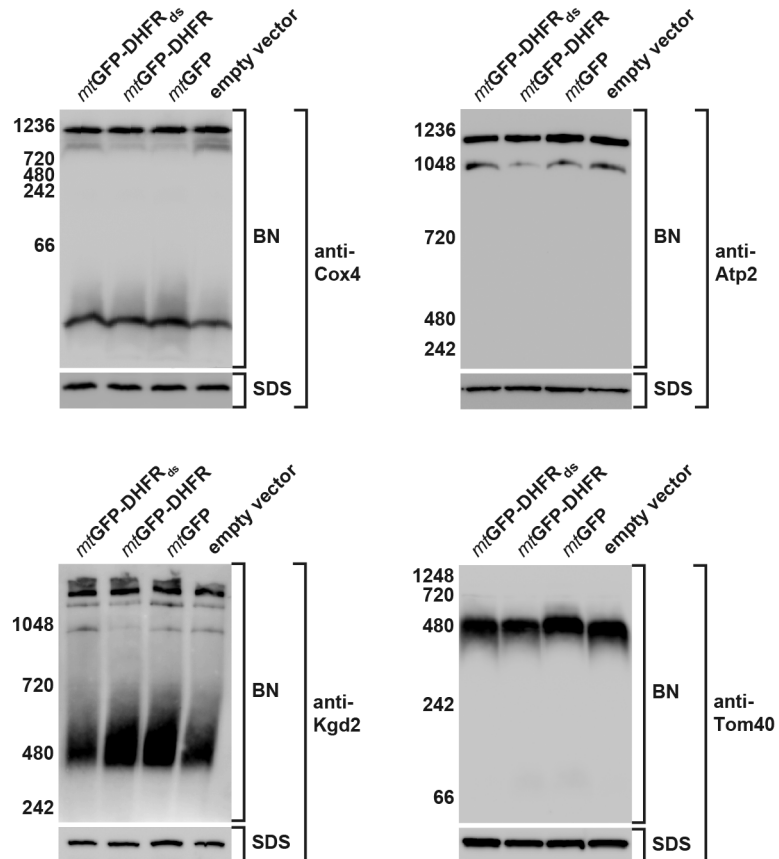

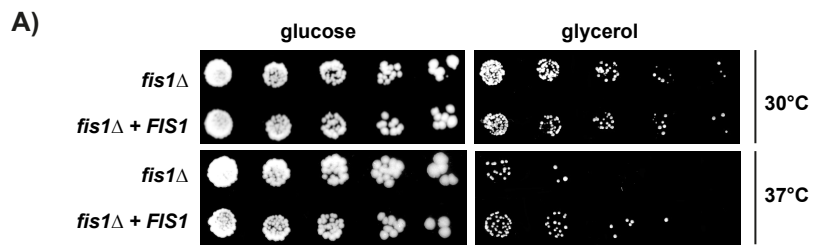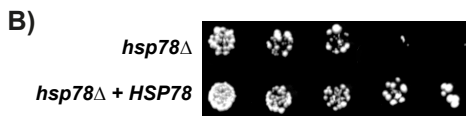

Sequence plasmid pMB028

gatccatgctaaaataCAAACCTTTACTAAAAATCTCGAAGAACTGTGAGGCTGCTATCCTCAGA  
GCGTCTAAGACTAGATTGAACACAATCCGCGCGTACGGTTCTACCGTTCCAAAATCCAA  
GTCGTTCGAACAAGACTCAAGAAAACGCACACAGTCATGGACTGCCTTGAGAGTCGGT  
GCAATTCTAGCCGCTACTAGTTCGGTGGCGTATCTAAACTGGCATAATGGCCAAATAGA  
CAACGAGCCGAAACTGaagcttatcgataccgtcgacATGTCTAAAGGTGAAGAATTATCACTGG  
TGTTGTCCCAATTTTGGTTGAATTAGATGGTGATGTTAATGGTCACAAATTTTCTGTCTCC  
GGTGAAGGTGAAGGTGATGCTACTTACGGTAAATTGACCTTAAAATTTATTTGTACTIONT  
GGTAAATTGCCAGTTCATGGCCAACCTTAGTCACTACTTTTCGGTTATGGTGTTCAATGT  
TTTGCTAGATACCCAGATCATATGAAACAACATGACTTTTTCAAGTCTGCCATGCCAGAA  
GGTTATGTTCAAGAAAGAACTATTTTTTTCAAAGATGACGGTAACTACAAGACCAGAGCT  
GAAGTCAAGTTTGAAGGTGATACCTTAGTTAATAGAATCGAATTAAGGTATTGATTTTA  
AAGAAGATGGTAACATTTTAGGTCACAAATTGGAATACAACATAACTCTCACAATGTTTA  
CATCATGGCTGACAAACAAAAGAATGGTATCAAAGTTAACTTCAAATTAGACACAACAT  
TGAAGATGGTCTGTTCAATTAGCTGACCATTATCAACAAAATACTCCAATTGGTGATGG  
TCCAGTCTTGTTACCAGACAACCATTACTTATCCACTCAATCTGCCTTATCCAAAGATCC  
AAACGAAAAGAGAGACCACATGGTCTTGTTAGAATTTGTTACTGCTGCTGGTATTACCCA  
TGGTATGgatgaattgtacaaaGaattCatggttcgaccattgaactccatcgctcgccgtgccaaaatg  
gggattggca  
agaacggagacctaccctggcctcgctcaggaacgagttcaagtactccaaagaatgaccacaacctgttcagtggaaggt  
aacagtgctggtgattatgggtaggaaaacctggttctcattcctgagaagaatcgaccttaaggacagaattaatagttc  
tcagtagagaactcaaagaaccaccacgaggagctatttcttccaaaagtttgatgatgccttaagactattgaacaaccg  
gaattggcaagtaaagtagacatggttgatagtcggaggcagttctgtttaccaggaagccatgaatcagccaggccacctca  
gactctcgtgacaaggatcatcgaggaattgaaagtgcacgttttccagaaattgattggggaaataaaacttcccaga  
ataccaggcgtcctctctgaggtccaggaggaaaaaggtcaagataagttgaagtctacgagaagaagactaaGaat  
tCCGCGGGGGATCTCCCATGTCTCTACTGGTGGTGGTGCCTTCTTTGGAATTATTGGAAG  
GTAAGGAATTGCCAGGTGTTGCTTTCTTATCCGAAAAGAAATAAATTGAATTGAATTGAA  
ATCGATAGATCAATTTTTTCTTTTCTTTTCCCCATCCTTTACGCTAAAATAATAGTTTAT  
TTATTTTTTTGAATATTTTTTATTTATATACGTATATATAGACTATTATTTACTTTTTAATAGA  
TTATTAAGATTTTTATTAATAAAAAAATTCGTCCCTCTTTTTAATGCCTTTTATGCAGTTTTT  
TTTTCCCATTCGATATTTCTATGTTCCGGTTTCAGCGTATTTAAGTTTAATAACTCGAAA  
ATTCTGCGTTTTCGAAAAGCTTGGCGTAATCATGGTCATAGCTGTTTCTGTGTGAAATTG  
TTATCCGCTCACAATTCCACACAACATACGAGCCGGAAGCATAAAGTGTAAGCCTGGG  
GTGCCTAATGAGTGAGCTAACTCACATTAATTGCGTTGCGCTCACTGCCCGCTTTCCAG  
TCGGGAAACCTGTCGTGCCAGCTGCATTAATGAATCGGCCAACGCGCGGGGAGAGGC  
GGTTTGCATATTGGGCGCTCTTCCGCTTCCGCTCACTGACTCGCTGCGCTCGGTTCG  
TTCGGCTGCGGCGAGCGGTATCAGCTCACTCAAAGGCGGTAATACGGTTATCCACAGA

ATCAGGGGATAACGCAGGAAAGAACATGTGAGCAAAGGCCAGCAAAGGCCAGGAAC  
CGTAAAAAGGCCGCGTTGCTGGCGTTTTTCCATAGGCTCCGCCCCCTGACGAGCATC  
ACAAAAATCGACGCTCAAGTCAGAGGTGGCGAAACCCGACAGGACTATAAAGATACCA  
GGCGTTTCCCCTGGAAGCTCCCTCGTGCGCTCTCCTGTTCCGACCCTGCCGCTTACC  
GGATACCTGTCCGCCTTTCTCCCTTCGGGAAGCGTGGCGCTTTTTCATAGCTCACGCTG  
TAGGTATCTCAGTTCGGTGTAGGTCGTTTCGCTCCAAGCTGGGCTGTGTGCACGAACCC  
CCCGTTCAGCCCGACCGCTGCGCCTTATCCGGTAACTATCGTCTTGAGTCCAACCCGG  
TAAGACACGACTTATCGCCACTGGCAGCAGCCACTGGTAACAGGATTAGCAGAGCGAG  
GTATGTAGGCGGTGCTACAGAGTTCTTGAAGTGGTGGCCTAACTACGGCTACACTAGAA  
GGACAGTATTTGGTATCTGCGCTCTGCTGAAGCCAGTTACCTTCGGAAAAAGAGTTGGT  
AGCTCTTGATCCGGCAAACAAACCACCGCTGGTAGCGGTGGTTTTTTTTGTTTGCAAGCA  
GCAGATTACGCGCAGAAAAAAGGATCTCAAGAAGATCCTTTGATCTTTTCTACGGGGT  
CTGACGCTCAGTGAACGAAAACACTCACGTTAAGGGATTTTGGTCATGAGATTATCAAAA  
AGGATCTTACCTAGATCCTTTTTAAATTA AAAATGAAGTTTTAAATCAATCTAAAGTATAT  
ATGAGTAACTTGGTCTGACAGTTACCAATGCTTAATCAGTGAGGCACCTATCTCAGCG  
ATCTGTCTATTTTCGTTTCATCCATAGTTGCCTGACTCCCCGTCGTGTAGATAACTACGATA  
CGGGAGGGCTTACCATCTGGCCCCAGTGCTGCAATGATACCGCGAGACCCACGCTCAC  
CGGCTCCAGATTTATCAGCAATAAACCAGCCAGCCGGAAGGGCCGAGCGCAGAAGTGG  
TCCTGCAACTTTATCCGCCTCCATCCAGTCTATTAATTGTTGCCGGGAAGCTAGAGTAA  
GTAGTTCGCCAGTTAATAGTTTGCGCAACGTTGTTGCCATTGCTACAGGCATCGTGGTG  
TCACGCTCGTCGTTTGGTATGGCTTCATTCAGCTCCGGTTCCCAACGATCAAGGCGAGT  
TACATGATCCCCATGTTGTGCAAAAAAGCGGTTAGCTCCTTCGGTCTCCGATCGTTG  
TCAGAAGTAAGTTGGCCGAGTGTTATCACTCATGGTTATGGCAGCACTGCATAATTCT  
CTTACTGTATGCCATCCGTAAGATGCTTTTCTGTGACTGGTGAGTACTCAACCAAGTCA  
TTCTGAGAATAGTGTATGCGGCGACCGAGTTGCTCTTGCCCGGCGTCAATACGGGATA  
ATACCGCGCCACATAGCAGA ACTTTAAAAGTGCTCATCATTGGAAAACGTTCTTTCGGGG  
CGAAA ACTCTCAAGGATCTTACCGCTGTTGAGATCCAGTTCGATGTAACCCACTCGTGC  
ACCCAACTGATCTTCAGCATCTTTTACTTTACCCAGCGTTTCTGGGTGAGCAAAAACAGG  
AAGGCAAAATGCCGCAAAAAAGGAATAAGGGCGACACGGAAATGTTGAATACTCATACT  
TCTTCTTTTTCAATATTATTGAAGCATTTATCAGGGTTATTGTCTCATGAGCGGATACAT  
ATTTGAATGTATTTAGAAAAATAAACAATAGGGGTTCCGCGCACATTTCCCGAAAAAGT  
GCCACCTGACGTCTAAGAAACCATTATTATCATGACATTAACCTATAAAAATAGGCGTAT  
CACGAGGCCCTTTCGTCTCGCGGTTTTCGGTGATGACGGTGAAAACCTCTGACACATG  
CAGCTCCCGGAGACGGTCACAGCTTGTCTGTAAGCGGATGCCGGGAGCAGACAAGCC  
CGTCAGGGCGCGTCAGCGGGTGTGGCGGGTGTGCGGGCTGGCTTAACTATGCGGCA  
TCAGAGCAGATTGTA CTGAGAGTGCACCATATGCGGTGTGAAATACCGCACAGATGCGT  
AAGGAGAAAATACCGCATCAGGCGCCATTGCCATTAGGCTGCGCAACTGTTGGGAA

GGGCGATCGGTGCGGGCCTCTTCGCTATTACGCCAGCTGGCGAAAGGGGGATGTGCT  
GCAAGGCGATTAAGTTGGGTAACGCCAGGGTTTTCCAGTCACGACGTTGTAAAACGA  
CGGCCAGTGAATTAATCCACGGACTATAGACTATACTAGTATACTCCGTCTACTGTACG  
ATACACTTCCGCTCAGGTCCTTGTCTTTAACGAGGCCTTACCACTCTTTTGTACTCTA  
TTGATCCAGCTCAGCAAAGGCAGTGTGATCTAAGATTCTATCTTCGCGATGTAGTAAAC  
TAGCTAGACCGAGAAAGAGACTAGAAATGCAAAGGCACTTCTACAATGGCTGCCATCA  
TTATTATCCGATGTGACGCTGCAGCTTCTCAATGATATTCTGAATACGCTTTGAGGAGATA  
CAGCCTAATATCCGACAACTGTTTTACAGATTTACGATCGTACTTGTACCCATCATTG  
AATTTTGAACATCCGAACCTGGGAGTTTTCCCTGAAACAGATAGTATATTTGAACCTGTA  
TAATAATATATAGTCTAGCGCTTTACGGAAGACAATGTATGTATTTTCGGTTCCTGGAGAA  
ACTATTGCATCTATTGCATAGGTAATCTTGCACGTCGCATCCCCGGTTCATTTTCTGCGT  
TTCCATCTTGCACCTCAATAGCATATCTTTGTTAACGAAGCATCTGTGCTTCATTTTGTAG  
AACAAAAATGCAACGCGAGAGCGCTAATTTTTCAAACAAAGAATCTGAGCTGCATTTTTA  
CAGAACAGAAATGCAACGCGAAAGCGCTAATTTTTACCAACGAAGAATCTGTGCTTCATTTT  
TGTA AACAAAAATGCAACGCGAGAGCGCTAATTTTTCAAACAAAGAATCTGAGCTGCAT  
TTTTACAGAACAGAAATGCAACGCGAGAGCGCTAATTTTTACCAACAAAGAATCTATACTTC  
TTTTTTGTTCTACAAAAATGCATCCCGAGAGCGCTAATTTTTCTAACAAAGCATCTTAGATT  
ACTTTTTTTCTCCTTTGTGCGCTCTATAATGCAGTCTCTTGATAACTTTTTGCACTGTAGG  
TCCGTTAAGGTTAGAAGAAGGCTACTTTGGTGTCTATTTTCTCTTCCATAAAAAAAGCCT  
GACTCCACTTCCCGGTTTACTGATTACTAGCGAAGCTGCGGGTGCATTTTTTCAAGAT  
AAAGGCATCCCCGATTATATTCTATACCGATGTGGATTGCGCATACTTTGTGAACAGAAA  
GTGATAGCGTTGATGATTCTTCATTGGTCAGAAAATTATGAACGGTTTCTTCTATTTTGTG  
TCTATATACTACGTATAGGAAATGTTTACATTTTCGTATTGTTTTCGATTCACTCTATGAAT  
AGTTCTTACTACAATTTTTTTGTCTAAAGAGTAATACTAGAGATAAACATAAAAAATGTAG  
AGGTCGAGTTTAGATGCAAGTTCAAGGAGCGAAAGGTGGATGGGTAGGTTATATAGGG  
ATATAGCACAGAGATATATAGCAAAGAGATACTTTTGTGCAATGTTTGTGGAAGCGGTAT  
TCGCAATATTTTAGTAGCTCGTTACAGTCCGGTGCCTTTTTGGTTTTTTGAAAGTGCCTC  
TTCAGAGCGCTTTTTGGTTTTCAAAGCGCTCTGAAGTTCCTATACTTTCTAGAGAATAGG  
AACTTCGGAATAGGAACTTCAAAGCGTTTCCGAAAACGAGCGCTTCCGAAAATGCAACG  
CGAGCTGCGCACATACAGCTCACTGTTCACGTGCGCACCTATATCTGCGTGTGCTGTA  
TATATATACATGAGAAGAACGGCATAGTGCCTGTTTATGCTTAAATGCGTACTTATAT  
GCGTCTATTTATGTAGGATGAAAGGTAGTCTAGTACCTCCTGTGATATTATCCCATTCCA  
TGCGGGGTATCGTATGCTTCTTACGACTACCCTTTAGCTGTTCTATATGCTGCCACTC  
CTCAATTGGATTAGTCTCATCCTTCAATGCTATCATTTCCTTTGATATTGGATCATATGCA  
TAGTACCGAGAACTAGTGCGAAGTAGTGATCAGGATTGCTGTTATCTGATGAGTATA  
CGTTGCTCCTGGCCACGGCAGAAGCACGCTTATCGCTCCAATTTCCACAACATTAGTCA  
ACTCCGTTAGGCCCTTCATTGAAAGAAATGAGGTCATCAATGTCTTCCAATGTGAGATT

TTGGGCCATTTTTATAGCAAAGATTGAATAAGGCGCATTTTTCTTCAAAGCTTTATTGTA  
CGATCTGACTAAGTTATCTTTAATAATTGGTATTCCTGTTTATTGCTTGAAGAATTGCCG  
GTCCTATTTACTCGTTTTAGGACTGGTTCAGAATTAATTCTCATGTTTGACAGCTTATCAT  
CGATAAGCTTTTCAATTCATCTTTTTTTTTTTTTGTTCTTTTTTTGATTCCGGTTTCTTGAA  
ATTTTTTTGATTCCGTAATCTCCGAGCAGAAGGAAGAACGAAGGAAGGAGCACAGACTT  
AGATTGGTATATATACGCATATGTGGTGTGAAGAAACATGAAATTGCCCAGTATTCTTA  
ACCCAAGTGCACAGAACAAAAACCTGCAGGAAACGAAGATAAATCATGTCGAAAGCTAC  
ATATAAGGAACGTGCTGCTACTCATCCTAGTCCTGTTGCTGCCAAGCTATTTAATATCAT  
GCACGAAAAGCAAACAACTTGTGTGCTTCATTGGATGTTTCGTACCACCAAGGAATTAC  
TGGAGTTAGTTGAAGCATTAGGTCCCAAATTTGTTTACTAAAAACACATGTGGATATCT  
TGACTGATTTTTCCATGGAGGGCACAGTTAAGCCGCTAAAGGCATTATCCGCCAAGTAC  
AATTTTTTACTCTTTCGAAGACAGAAAATTTGCTGACATTGGTAATACAGTCAAATTGCAGT  
ACTCTGCGGGTGTATACAGAATAGCAGAATGGGCAGACATTACGAATGCACACGGTGT  
GGTGGGCCCAGGTATTGTTAGCGTTTTGAAGCAGGCGGCGGAAGAAGTAACAAAGGAA  
CCTAGAGGCCTTTTGATGTTAGCAGAATTGTCATGCAAGGGCTCCCTATCTACTGGAGA  
ATATACTAAGGGTACTGTTGACATTGCGAAGAGCGACAAAGATTTTGTATCGGCTTTAT  
TGCTCAAAGAGACATGGGTGGAAGAGATGAAGGTTACGATTGGTTGATTATGACACCCG  
GTGTGGGTTTAGATGACAAGGGAGACGCATTGGGTCAACAGTATAGAACCGTGGATGA  
TGTGGTCTCTACAGGATCTGACATTATTATTGTTGGAAGAGGACTATTTGCAAAGGGAA  
GGGATGCTAAGGTAGAGGGTGAACGTTACAGAAAAGCAGGCTGGGAAGCATATTTGAG  
AAGATGCGGCCAGCAAACTAAAAACTGTATTATAAGTAAATGCATGTATACTAAACTC  
ACAAATTAGAGCTTCAATTTAATTATATCAGTTATTACCCCTTAGCCTAAAAAACCTTCT  
CTTTGGAACTTTCAGTAATACGCTTAACTGCTCATTGCTATATTGAAGTACGGATTAGAA  
GCCGCCGAGCGGGTACAGCCCTCCGAAGGAAGACTCTCCTCCGTGCGTCTCGTCTT  
CACCGGTCGCGTTCCTGAAACGCAGATGTGCCTCGCGCCGCACTGCTCCGAACAATAA  
AGATTCTACAATACTAGCTTTTATGGTTATGAAGAGGAAAAATTGGCAGTAACCTGGCCC  
CACAAACCTTCAAATGAACGAATCAAATTAACAACCATAGGATGATAATGCGATTAGTTT  
TTAGCCTTATTTCTGGGGTAATTAATCAGCGAAGCGATGATTTTTGATCCTCGAGCCGC  
TCGAGCGCTCGAGCAGATCCGCCAGGCGTGTATATAGCGTGGATGGCCAGGCAACTTT  
AGTGCTGACACATACAGGCATATATATATGTGTGCGACGACACATGATCATATGGCATG  
CATGTGCTCTGTATGTATATAAACTCTTGTTTTCTTTTTCTCTAAATATTCTTTCTTA  
TACATTAGGTCTTTGTAGCATAAATACTATACTTCTATAGACACGCAACACAAATACA  
CACACTAAATTAATAATGACCG

Sequence plasmid pMB029

CGGTCATTATTAATTTAGTGTGTGATTTGTGTTTGCCTGTCTATAGAAGTATAGTAATTT  
ATGCTACAAAGGACCTAATGTATAAGGAAAGAATATTTAGAGAAAAGAAGAAAACAAGAG  
TTTTATATACATACAGAGCACATGCATGCCATATGATCATGTGTGTCGTCGCACACATATAT  
ATATGCCTGTATGTGTCAGCACTAAAGTTGCCTGGCCATCCACGCTATATACACGCCTG  
GCGGATCTGCTCGAGCGCTCGAGCGGCTCGAGGATCAAAAATCATCGCTTCGCTGATT  
AATTACCCAGAAAATAAGGCTAAAAAACTAATCGCATTATCATCCTATGGTTGTTAATTTG  
ATTCGTTTCATTTGAAGTTTGTGGGGCCAGGTTACTGCCAATTTTTCTCCTTCATAACCA  
TAAAAGCTAGTATTGTAGAATCTTTATTGTTCCGAGCAGTGCGGCGCGAGGCACATCTG  
CGTTTCAGGAACGCGACCGGTGAAGACGAGGACGCACGGAGGAGAGTCTTCCTTCGG  
AGGGCTGTCACCCGCTCGGCGGCTTCTAATCCGTACTTCAATATAGCAATGAGCAGTTA  
AGCGTATTACTGAAAGTTCCAAAGAGAAGTTTTTTTTAGGCTAAGGGGTAATAACTGATA  
TAATTAATTGAAGCTCTAATTTGTGAGTTTAGTATACATGCATTTACTTATAATAACAGTTT  
TTTAGTTTTGCTGGCCGCATCTTCTCAAATAGCTTCCCAGCCTGCTTTTTCTGTAACGTT  
CACCTCTACCTTAGCATCCCTTCCCTTTGCAAATAGTCCTCTTCCAACAATAATAATGT  
CAGATCCTGTAGAGACCACATCCACGTTCTATACTGTTGACCCAATGCGTCTCCC  
TTGTCATCTAAACCCACACCGGTGTGATAATCAACCAATCGTAACCTTCATCTCTTCCA  
CCCATGTCTCTTTGAGCAATAAAGCCGATAAACAAATCTTTGTGCTCTTCGCAATGTCA  
ACAGTACCCTTAGTATATTTCCAGTAGATAGGGAGCCCTTGCATGACAATTTCTGCTAAC  
ATCAAAAAGGCCTCTAGGTTCTTTGTTACTTCTTCCGCCGCTGCTTCAAACCGCTAACAA  
ATACCTGGGCCACACACCGTGTGCATTGTAATGTCTGCCATTCTGCTATTCTGTA  
TACACCCGCAGAGTACTGCAATTTGACTGTATTACCAATGTCAGCAAATTTTCTGTCTTC  
GAAGAGTAAAAAATTGACTTGGCGGATAATGCCTTTAGCGGCTTAACTGTGCCCTCCA  
TGGAAAAATCAGTCAAGATATCCACATGTGTTTTTAGTAAACAAATTTTGGGACCTAATG  
CTTCAACTAACTCCAGTAATTCCTTGGTGGTACGAACATCCAATGAAGCACACAAGTTTG  
TTTGCTTTTCGTGCATGATATTAATAGCTTGGCAGCAACAGGACTAGGATGAGTAGCA  
GCACGTTCCCTTATATGTAGCTTTGACATGATTTATCTTCGTTTTCTGCAGGTTTTTGTT  
TGTGCAGTTGGGTTAAGAATACTGGGCAATTTTCATGTTTTCTTCAACACCACATATGCGTA  
TATATACCAATCTAAGTCTGTGCTCCTTCTTCGTTCTTCTTCTGCTCGGAGATTACCG  
AATCAAAAAAATTTCAAAGAAACCGGAATCAAAAAAAGAACAACAAAAAAGATGAA  
TTGAAAAGCTTATCGATGATAAGCTGTCAAACATGAGAATTAATTCTGAACCAGTCCTAA  
AACGAGTAAATAGGACCGGCAATTCCTCAAGCAATAAACAGGAATACCAATTATTAAG  
ATAACTTAGTCAGATCGTACAATAAAGCTTTGAAGAAAATGCGCCTTATTCAATCTTTG  
CTATAAAAAATGGCCAAAATCTCACATTGGAAGACATTTGATGACCTCATTTCTTTCAAT  
GAAGGGCCTAACGGAGTTGACTAATGTTGTGGGAAATTGGAGCGATAAGCGTGCTTCT  
GCCGTGGCCAGGACAACGTATACTCATCAGATAACAGCAATACCTGATCACTACTTCGC  
ACTAGTTTCTCGGTACTATGCATATGATCCAATATCAAAGGAAATGATAGCATTGAAGGA  
TGAGACTAATCCAATTGAGGAGTGGCAGCATATAGAACAGCTAAAGGGTAGTGCTGAAG  
GAAGCATAACGATACCCCGCATGGAATGGGATAATATCACAGGAGGTAAGTACTACCTT  
TCATCCTACATAAATAGACGCATATAAGTACGCATTTAAGCATAAACACGCACTATGCCG  
TTCTTCTCATGTATATATATACAGGCAACACGCAGATATAGGTGCGACGTGAACAGTG  
AGCTGTATGTGCGCAGCTCGCGTTGCATTTTTCGGAAGCGCTCGTTTTTCGGAACGCTTT  
GAAGTTCCTATTCCGAAGTTCCTATTCTCTAGAAAATAGGAACTTCAGAGCGCTTTTTG  
AAAACCAAAGCGCTCTGAAGACGCCTTTCAAAAAACCAAACCGCACCAGGACTGTAA  
CGAGCTACTAAAATATTGCGAATACCGCTTCCACAAACATTGCTCAAAGTATCTCTTTG  
CTATATATCTCTGTGCTATATCCCTATATAACCTACCCATCCACCTTTTCGCTCCTTGA  
TGCATCTAAACTCGACCTCTACATTTTTTATGTTTATCTCTAGTATTACTCTTTAGACAAA  
AAATTGTAGTAAGAACTATTCATAGAGTGAATCGAAAACAATACGAAAATGTAAACATTT  
CTATACGTAGTATATAGAGACAAAATAGAAGAAACCGTTCATAATTTTCTGACCAATGAA  
GAATCATCAACGCTATCACTTTCTGTTACAAAGTATGCGCAATCCACATCGGTATAGAA  
TATAATCGGGGATGCCTTTATCTTGAAAAATGCACCCGCAGCTTCGCTAGTAATCAGTA  
AACGCGGGAAGTGGAGTCAGGCTTTTTTTATGGAAGAGAAAATAGACACCAAAGTAGCC  
TTCTTCTAACCTTAACGGACCTACAGTGCAAAAAGTTATCAAGAGACTGCATTATAGAGC  
GCACAAAGGAGAAAAAAGTAATCTAAGATGCTTTGTTAGAAAAATAGCGCTCTCGGGA



TGCATTTTTGTAGAACAAAAAGAAGTATAGATTCTTTGTTGGTAAAATAGCGCTCTCGC  
GTTGCATTTCTGTTCTGTAAAAATGCAGCTCAGATTCTTTGTTTAAAAATTAGCGCTCTC  
GCGTTGCATTTTTGTTTTACAAAAATGAAGCACAGATTCTTCGTTGGTAAAATAGCGCTT  
TCGCGTTGCATTTCTGTTCTGTAAAAATGCAGCTCAGATTCTTTGTTTAAAAATTAGCG  
CTCTCGCGTTGCATTTTTGTTCTACAAAATGAAGCACAGATGCTTCGTTAACAAAGATAT  
GCTATTGAAGTGAAGATGGAAACGCAGAAAATGAACCGGGGATGCGACGTGCAAGAT  
TACCTATGCAATAGATGCAATAGTTTCTCCAGGAACCGAAATACATACATTGTCTTCCGT  
AAAGCGCTAGACTATATATTATTATACAGGTTCAAATATACTATCTGTTTCAGGGAAAAC  
CCCAGGTTTCGGATGTTCAAAATTCATGATGGGTAACAAGTACGATCGTAAATCTGTAAA  
ACAGTTTGTCCGATATTAGGCTGTATCTCCTCAAAGCGTATTGAATATCATTGAGAAGC  
TGCAGCGTCACATCGGATAATAATGATGGCAGCCATTGTAGAAGTGCCTTTTGCATTTCT  
AGTCTCTTTCTCGGTCTAGCTAGTTTTACTACATCGCGAAGATAGAATCTTAGATCACAC  
TGCCTTTGCTGAGCTGGATCAATAGAGTAACAAAAGAGTGGTAAGGCCTCGTTAAAGGA  
CAAGGACCTGAGCGGAAGTGTATCGTACAGTAGACGGAGTATACTAGTATAGTCTATAG  
TCCGTGGAATTAATCACTGGCCGTCGTTTTACAACGTCGTCGACTGGGAAAACCTGGC  
GTTACCCAACTTAATCGCCTTGCAGCACATCCCCCTTTCCGCGACTGGCGTAATAGCGA  
AGAGCCCCGACCGATCGCCCTTCCCAACAGTTGCGCAGCCTGAATGGCGAATGGCGA  
CCTGATCGGGTATTTTTCTCCTTACGCATCTGTGCGGTATTTACACCCGCATATGGTGCA  
CTCTCAGTACAATCTGCTCTGATGCCGCTAGTTAAAGCCAGCCCCGACACCCGCCAAC  
CCCGCTGACCGCCCTGACGGGCTTGTCTGCTCCCGGCATCCGCTTACAGACAAGCTG  
TGACCGTCTCCGGGAGCTGCATGTGTGTCAGAGGTTTTACCGTCATCACCGAAACGCGC  
GAGACGAAAGGGCCTCGTGATACGCCTATTTTTATAGTTAATGTCATGATAATAATGGT  
TTCTTAGACGTCAGGTGGCACTTTTCCGGGAAATGTGCGCGGAACCCCTATTTGTTTAT  
TTTTCTAAATACATTCAAATATGTATCCGCTCATGAGACAATAACCCTGATAAATGCTTCA  
ATAATATTGAAAAAGGAAGAGTATGAGTATTCAACATTTCCGTGTGCGCCCTTATTCCCT  
TTTTGCGGCATTTTGCCTTCTGTTTTTGTACCCAGAAACGCTGGTAAAAGTAAAAGA  
TGCTGAAGATCAGTTGGGTGCACGAGTGGGTTACATCGAACTGGATCTCAACAGCGGT  
AAGATCCTTGAGAGTTTTGCCCCGAAGAACGTTTTTCCAATGATGAGCACTTTTAAAGTT  
CTGCTATGTGGCGCGGTATTATCCCGTATTGACGCCGGGCAAGAGCAACTCGGTGCC  
GCATACACTATTCTCAGAATGACTTGGTTGAGTACTCACCGATCACAGAAAAGCATCTTA  
CGGATGGCATGACAGTAAGAGAATTATGCAGTGTGCCATAACCATGAGTGATAACACT  
GCGGCCAACTTACTTCTGACAACGATCGGAGGACCGAAGGAGCTAACCGCTTTTTTGC  
CAACATGGGGGATCATGTAACCTCGCCTTGATCGTTGGGAACCGGAGCTGAATGAAGCC  
ATACCAAACGACGAGCGTGACACCACGATGCCTGTAGCAATGGCAACAACGTTGCGCA  
AACTATTAACCTGGCGAACTACTTACTCTAGCTTCCGGGCAACAATTAATAGACTGGATGG  
AGGCGGATAAAGTTGCAGGACCACTTCTGCGCTCGGCCCTTCCGGCTGGCTGGTTTAT  
TGCTGATAAATCTGGAGCCGGTGAGCGTGGGTCTCGCGGTATCATTGCAGCACTGGGG  
CCAGATGGTAAGCCCTCCCGTATCGTAGTTATCTACACGACGGGGAGTCAGGCAACTAT  
GGATGAACGAAATAGACAGATCGCTGAGATAGGTGCCTCACTGATTAAGCATTGGTAAC  
TGTCAGACCAAGTTTACTCATATATACTTTAGATTGATTTAAAACCTTCATTTTTAATTTAA  
AGGATCTAGGTGAAGATCCTTTTTGATAATCTCATGACCAAAATCCCTTAACGTGAGTTT  
TCGTTCCACTGAGCGTCAGACCCCGTAGAAAAGATCAAAGGATCTTCTTGAGATCCTTT  
TTTTCTGCGCGTAATCTGCTGCTTGCAAACAAAAAACCACCGCTACCAGCGGTGGTTT  
GTTTGC CGGATCAAGAGCTACCAACTCTTTTTCCGAAGGTAACGGCTTCAGCAGAGCG  
CAGATACCAAACTGTCTTCTAGTGTAGCCGTAGTTAGGCCACCACTTCAAGAACTCT  
GTAGCACCGCCTACATACCTCGCTCTGCTAATCCTGTTACCAGTGGCTGCTGCCAGTGG  
CGATAAGTCTGTCTTACCGGGTTGGACTCAAGACGATAGTTACCGGATAAGGCGCAG  
CGGTCCGGCTGAACGGGGGGTTCGTGCACACAGCCCAGCTTGGAGCGAACGACCTAC  
ACCGAACTGAGATACCTACAGCGTGAGCTATGAGAAAGCGCCACGCTTCCCGAAGGGA  
GAAAGGCGGACAGGTATCCGGTAAGCGGCAGGGTCGGAACAGGAGAGCGCACGAGG  
GAGCTTCCAGGGGAAACGCCTGGTATCTTTATAGTCTGTGCGGTTTTGCCACCTCTG  
ACTTGAGCGTCGATTTTTGTGATGCTCGTCAGGGGGGCGGAGCCTATGAAAAACGCC  
AGCAACGCGGCCTTTTACGGTTTCTGGCCTTTTTGCTGGCCTTTTTGCTCACATGTTCTTT  
CCTGCGTTATCCCCTGATTCTGTGGATAACCGTATTACCGCCTTTGAGTGAGCTGATAC  
CGCTCGCCGACGCCGAACGACCGAGCGCAGCGAGTCAGTGAGCGAGGAAGCGGAAG  
AGCGCCCAATACGCAAACCGCCTCTCCCCGCGCGTTGGCCGATTCATTAATGCAGCTG

GCACGACAGGTTTCCCGACTGGAAAGCGGGCAGTGAGCGCAACGCAATTAATGTGAGT  
TAGCTCACTCATTAGGCACCCAGGCTTTACACTTTATGCTTCCGGCTCGTATGTTGTGT  
GGAATTGTGAGCGGATAACAATTTACACAGGAAACAGCTATGACCATGATTACGCCAA  
GCTTTTCGAAACGCAGAATTTTCGAGTTATTAACCTTAAAATACGCTGAAACCCGAACAT  
AGAAATATCGAATGGGAAAAAAAAAACTGCATAAAAAGGCATTA AAAAGAGGGACGAATTTT  
TTTTTAATAAAAATCTTAATAATCTATTA AAAAGTAAATAATAGTCTATATATACGTATATAAA  
TAAAAAATATTCAAAAAATAAAAATAAACTATTATTTTAGCGTAAAGGATGGGGAAAGAGAA  
AAGAAAAAATTGATCTATCGATTTCAATTCAATTCAATTTATTTCTTTTCGGATAAGAAA  
GCAACACCTGGCAATTCCTTACCTTCCAATAATTCCAAGAAGCACCACCACCAGTAGA  
GACATGGGAGATCCCCCGCGGaattCttagcttttctctgtagacttcaaacttatactgatgccttttctctcctgga  
cctcagagaggagcgcctgggtattctgggagaagttatattcccaaatacaatttctgggaaaaacgtgtcactttcaaattcctgc  
atgatcctgtcacgaagagctgaggtggcctggctgattcatggcttctgtaaacagaactgcctccgactatccaaacctg  
tctactttactgccaattccggtgttcaataagtcttaaggcatcatccaaactttggcaagaaaatgagctcctcgtggtggtcctt  
gagttctactgagaactatattaattctgtcctttaaaggctgattcttctcaggaatggagaaccagggtttcctaccataatcacc  
agacactgtttaccttccactgaacaggtgtggtcattcttgggaagtactgaactcgtcctgagcggaggccagggtagggtcctc  
gttctgccaatccccatattttgggacacggcgacgatggagttcaatggtcgaacctGaattCttgtacaattcatcCATAAC  
CATGGGTAATACCAGCAGCAGTAACAAATTCTAACAAGACCATGTGGTCTCTCTTTTCGT  
TTGGATCTTTGGATAAGGCAGATTGAGTGGATAAGTAATGGTTGTCTGGTAACAAGACT  
GGACCATCACCAATTGGAGTATTTTGTGATAATGGTCAGCTAATTGAACAGAACCATCT  
TCAATGTTGTGTCTAATTTTGAAGTTAATTTGATACCATTCTTTTGTGTCAGCCATGA  
TGAAACATTGTGAGAGTTATAGTTGATTCCAATTTGTGACCTAAAATGTTACCATCTTC  
TTAAAATCAATACCTTTTAATTCGATTCTATTAACCTAAGGTATCACCTTCAAACCTTGACTT  
CAGCTCTGGTCTTGTAGTTACCGTCATCTTTGAAAAAATAGTTCTTTCTTGAACATAACC  
TTCTGGCATGGCAGACTTGAAAAAGTCATGTTGTTTCATATGATCTGGGTATCTAGCAA  
ACATTGAACACCATAACCGAAAGTAGTGACTAAGGTTGGCCATGGAACCTGGCAATTTAC  
CAGTAGTACAAATAAATTTTAAGGTCAATTTACCGTAAGTAGCATCACCTTCACCTTCAC  
CGGAGACAGAAAATTTGTGACCATTAACATCACCATCTAATTCAACCAAATTTGGGACAA  
CACCAGTGAATAATTCttcacctttagacatGgatc

Sequence plasmid pMB031

CGGTCATTATTAATTTAGTGTGTGATTTGTGTTTGGCGTGTCTATAGAAGTATAGTAATTT  
ATGCTACAAAGGACCTAATGTATAAGGAAAGAATATTTAGAGAAAAGAAGAAAACAAGAG  
TTTTATATACATACAGAGCACATGCATGCCATATGATCATGTGTGTCGTCGCACACATATAT  
ATATGCCTGTATGTGTCAGCACTAAAGTTGCCTGGCCATCCACGCTATATACACGCCTG  
GCGGATCTGCTCGAGCGCTCGAGCGGCTCGAGGATCAAAAATCATCGCTTCGCTGATT  
AATTACCCAGAAATAAGGCTAAAAACTAATCGCATTATCATCCTATGGTTGTTAATTTG  
ATTCGTTCAATTTGAAGGTTTGTGGGGCCAGGTTACTGCCAATTTTTCTCTTCATAACCA  
TAAAAGCTAGTATTGTAGAATCTTTATTGTTCCGGAGCAGTGCGGCGCGAGGCACATCTG  
CGTTTCAGGAACGCGACCGGTGAAGACGAGGACGCACGGAGGAGAGTCTTCCTTCGG  
AGGGCTGTCACCCGCTCGGCGGCTTCTAATCCGTACTTCAATATAGCAATGAGCAGTTA  
AGCGTATTACTGAAAGTTCCAAAGAGAAGGTTTTTTTTAGGCTAAGGGGTAATAACTGATA  
TAATTAATTGAAGCTCTAATTTGTGAGTTTAGTATACATGCATTTACTTATAATACAGTTT  
TTTAGTTTTGCTGGCCGCATCTTCTCAAATATGCTTCCCAGCCTGCTTTTTCTGTAACGTT  
CACCTCTACCTTAGCATCCCTTCCCTTTGCAAATAGTCCTCTTCCAACAATAAATGT  
CAGATCCTGTAGAGACCACATCATCCACGGTTCTATACTGTTGACCCAATGCGTCTCCC  
TTGTCATCTAAACCCACACCGGGTGCATAATCAACCAATCGTAACCTTCATCTCTTCCA  
CCCATGTCTCTTTGAGCAATAAAGCCGATAACAAAATCTTTGTCGCTCTTCGCAATGTCA  
ACAGTACCCTTAGTATATTCTCCAGTAGATAGGGAGCCCTTGCATGACAATTCTGCTAAC  
ATCAAAAGGCCTCTAGGTTCTTTGTTACTTCTTCCGCCGCCTGCTTCAAACCGCTAACA  
ATACCTGGGCCCACCACACCGTGTGCATTCGTAATGTCTGCCATTCTGCTATTCTGTA  
TACACCCGCAGAGTACTGCAATTTGACTGTATTACCAATGTCAGCAAATTTTCTGTCTTC  
GAAGAGTAAAAAATTGACTTTGGCGGATAATGCCTTTAGCGGCTTAACTGTGCCCTCCA  
TGAAAAAATCAGTCAAGATATCCACATGTGTTTTTAGTAAACAAATTTTGGGACCTAATG  
CTTCAACTAACTCCAGTAATTCCTTGGTGGTACGAACATCCAATGAAGCACACAAGTTTG  
TTTGCTTTTTCGTGCATGATATTAATAGCTTGGCAGCAACAGGACTAGGATGAGTAGCA  
GCACGTTCCCTTATATGTAGCTTTGACATGATTTATCTTCGTTTCCTGCAGGTTTTTGTTT  
TGTGCAGTTGGGTTAAGAATACTGGGCAATTTTCATGTTTCTTCAACACCACATATGCGTA  
TATATACCAATCTAAGTCTGTGCTCCTTCCCTTCGTTCTTCTTCTGCTCGGAGATTACCG  
AATCAAAAAAATTTCAAAGAAACCGGAATCAAAAAAAGAACAACAAAAAAGATGAA  
TTGAAAAGCTTATCGATGATAAGCTGTCAAACATGAGAATTAATTCTGAACCAGTCCTAA  
AACGAGTAAATAGGACCGGCAATTCTTCAAGCAATAAACAGGAATACCAATTATTAAG  
ATAACTTAGTCAGATCGTACAATAAAGCTTTGAAGAAAAATGCGCCTTATTCAATCTTTG  
CTATAAAAAATGGCCCAAATCTCACATTGGAAGACATTTGATGACCTCATTTCTTTCAAT  
GAAGGGCCTAACGGAGTTGACTAATGTTGTGGGAAATTGGAGCGATAAGCGTGCTTCT  
GCCGTGGCCAGGACAACGTATACTCATCAGATAACAGCAATACCTGATCACTACTTCGC

ACTAGTTTCTCGGTACTATGCATATGATCCAATATCAAAGGAAATGATAGCATTGAAGGA  
TGAGACTAATCCAATTGAGGAGTGGCAGCATATAGAACAGCTAAAGGGTAGTGCTGAAG  
GAAGCATAACGATACCCCGCATGGAATGGGATAATATCACAGGAGGTAAGTAGACTACCTT  
TCATCCTACATAAATAGACGCATATAAGTACGCATTTAAGCATAAACACGCACTATGCCG  
TTCTTCTCATGTATATATATACAGGCAACACGCAGATATAGGTGCGACGTGAACAGTG  
AGCTGTATGTGCGCAGCTCGCGTTGCATTTTCGGAAGCGCTCGTTTTCGGAAACGCTTT  
GAAGTTCCTATTCCGAAGTTCCTATTCTCTAGAAAGTATAGGAACTTCAGAGCGCTTTTG  
AAAACCAAAGCGCTCTGAAGACGCACCTTTCAAAAACCAAACGCACCGGACTGTAA  
CGAGCTACTAAAATATTGCGAATACCGCTTCCACAAACATTGCTCAAAGTATCTCTTTG  
CTATATATCTCTGTGCTATATCCCTATATAACCTACCCATCCACCTTTGCTCCTTGA  
TGCATCTAAACTCGACCTCTACATTTTTTATGTTTATCTCTAGTATTACTCTTTAGACAAA  
AAATTGTAGTAAGAACTATTCATAGAGTGAATCGAAAACAATACGAAAATGTAAACATTT  
CTATACGTAGTATATAGAGACAAAATAGAAGAAACCGTTCATAATTTTCTGACCAATGAA  
GAATCATCAACGCTATCACTTTCTGTTCAAAAGTATGCGCAATCCACATCGGTATAGAA  
TATAATCGGGGATGCCTTTATCTTGAAAAATGCACCCGCAGCTTCGCTAGTAATCAGTA  
AACGCGGGAAGTGGAGTCAGGCTTTTTTTATGGAAGAGAAAATAGACACCAAAGTAGCC  
TTCTTCTAACCTTAACGGACCTACAGTGCAAAAAGTTATCAAGAGACTGCATTATAGAGC  
GCACAAAGGAGAAAAAAGTAATCTAAGATGCTTTGTTAGAAAATAGCGCTCTCGGGA  
TGCATTTTTGTAGAACA AAAAAGAAGTATAGATTCTTTGTTGGTAAAATAGCGCTCTCGC  
GTTGCATTTCTGTTCTGTAAAATGCAGCTCAGATTCTTTGTTTGAAAATAGCGCTCTC  
GCGTTGCATTTTTGTTTTACAAAATGAAGCACAGATTCTTCGTTGGTAAAATAGCGCTT  
TCGCGTTGCATTTCTGTTCTGTAAAATGCAGCTCAGATTCTTTGTTTGAAAATAGCG  
CTCTCGCGTTGCATTTTTGTTCTACAAAATGAAGCACAGATGCTTCGTTAACAAAGATAT  
GCTATTGAAGTGCAAGATGGAACGCAGAAAATGAACCGGGGATGCGACGTGCAAGAT  
TACCTATGCAATAGATGCAATAGTTTCTCCAGGAACCGAAATACATACATTGTCTTCGT  
AAAGCGCTAGACTATATATTATACAGGTTCAAATATACTATCTGTTTCAGGGAAA  
ACTCCCAGTTTCGGATGTTCAAAATCAATGATGGGTAACAAGTACGATCGTAAATCTGTAAA  
ACAGTTTGTGGATATTAGGCTGTATCTCCTCAAAGCGTATTCGAATATCATTGAGAAGC  
TGCAGCGTCACATCGGATAATAATGATGGCAGCCATTGTAGAAGTGCCTTTTGCATTTCT  
AGTCTCTTTCTCGGTCTAGCTAGTTTTACTACATCGCGAAGATAGAATCTTAGATCACAC  
TGCTTTGCTGAGCTGGATCAATAGAGTAACAAAAGAGTGGTAAGGCCTCGTTAAAGGA  
CAAGGACCTGAGCGGAAGTGTATCGTACAGTAGACGGAGTATACTAGTATAGTCTATAG  
TCCGTGGAATTAATCACTGGCCGTCGTTTTACAACGTCGTGACTGGGAAAACCTGGC  
GTTACCCAACTTAATCGCCTTGCAGCACATCCCCCTTTGCCCAGCTGGCGTAATAGCGA  
AGAGGCCCGCACCGATCGCCCTTCCAACAGTTGCGCAGCCTGAATGGCGAATGGCG  
CCTGATGCGGTATTTTCTCCTTACGCATCTGTGCGGTATTTACACCCGCATATGGTGCA  
CTCTCAGTACAATCTGCTCTGATGCCGCATAGTTAAGCCAGCCCCGACACCCGCCAACA

CCCGCTGACGCGCCCTGACGGGCTTGTCTGCTCCCGGCATCCGCTTACAGACAAGCTG  
TGACCGTCTCCGGGAGCTGCATGTGTGTCAGAGGTTTTACCGTCATCACCGAAACGCGC  
GAGACGAAAGGGCCTCGTGATACGCCTATTTTTATAGGTTAATGTCATGATAATAATGGT  
TTCTTAGACGTCAGGTGGCACTTTTCGGGGAAATGTGCGCGGAACCCCTATTTGTTTAT  
TTTTCTAAATACATTCAAATATGTATCCGCTCATGAGACAATAACCCTGATAAATGCTTCA  
ATAATATTGAAAAAGGAAGAGTATGAGTATTCAACATTTCCGTGTGCGCCCTTATTCCCTT  
TTTTGCGGCATTTTGCCTTCCTGTTTTTGTCTACCCAGAAACGCTGGTGAAAGTAAAAGA  
TGCTGAAGATCAGTTGGGTGCACGAGTGGGTACATCGAACTGGATCTCAACAGCGGT  
AAGATCCTTGAGAGTTTTCGCCCCGAAGAACGTTTTCCAATGATGAGCACTTTTAAAGTT  
CTGCTATGTGGCGCGGTATTATCCCGTATTGACGCCGGGCAAGAGCAACTCGGTGCGC  
GCATACACTATTCTCAGAATGACTTGGTTGAGTACTCACCAGTCACAGAAAAGCATCTTA  
CGGATGGCATGACAGTAAGAGAATTATGCAGTGCTGCCATAACCATGAGTGATAACACT  
GCGGCCAACTTACTTCTGACAACGATCGGAGGACCGAAGGAGCTAACCGCTTTTTTGTCA  
CAACATGGGGGATCATGTAACCTCGCCTTGATCGTTGGGAACCGGAGCTGAATGAAGCC  
ATACCAAACGACGAGCGTGACACCACGATGCCTGTAGCAATGGCAACAACGTTGCGCA  
AACTATTAACCTGGCGAACTACTTACTCTAGCTTCCCGGCAACAATTAATAGACTGGATGG  
AGGCGGATAAAGTTGCAGGACCACTTCTGCGCTCGGCCCTTCCGGCTGGCTGGTTTAT  
TGCTGATAAATCTGGAGCCGGTGAGCGTGGGTCTCGCGGTATCATTGCAGCACTGGGG  
CCAGATGGTAAGCCCTCCCGTATCGTAGTTATCTACACGACGGGGAGTCAGGCAACTAT  
GGATGAACGAAATAGACAGATCGCTGAGATAGGTGCCTCACTGATTAAGCATTGGTAAC  
TGTCAGACCAAGTTTACTCATATATACTTTAGATTGATTTAAAACCTTCATTTTTAATTTAAA  
AGGATCTAGGTGAAGATCCTTTTTGATAATCTCATGACCAAATCCCTAACGTGAGTTT  
TCGTTCCACTGAGCGTCAGACCCCGTAGAAAAGATCAAAGGATCTTCTTGAGATCCTTT  
TTTTCTGCGCGTAATCTGCTGCTTGCAAACAAAAAACCACCGCTACCAGCGGTGGTTT  
GTTTGCCGGATCAAGAGCTACCAACTCTTTTTCCGAAGGTAACCTGGCTTCAGCAGAGCG  
CAGATACCAAATACTGTCCTTCTAGTGTAGCCGTAGTTAGGCCACCACTTCAAGAACTCT  
GTAGCACCGCCTACATACCTCGCTCTGCTAATCCTGTTACCAGTGGCTGCTGCCAGTGG  
CGATAAGTCGTGTCTTACCGGGTTGGACTCAAGACGATAGTTACCGGATAAGGCGCAG  
CGGTGCGGCTGAACGGGGGTTTCGTGCACACAGCCCAGCTTGGAGCGAACGACCTAC  
ACCGAACTGAGATACCTACAGCGTGAGCTATGAGAAAGCGCCACGCTTCCCGAAGGGA  
GAAAGGCGGACAGGTATCCGGTAAGCGGCAGGGTCGGAACAGGAGAGCGCACGAGG  
GAGCTTCCAGGGGAAACGCCTGGTATCTTTATAGTCCTGTGCGGTTTTCGCCACCTCTG  
ACTTGAGCGTCGATTTTTGTGATGCTCGTCAGGGGGGCGGAGCCTATGGAAAAACGCC  
AGCAACGCGGCCTTTTTACGGTTCCTGGCCTTTTTGCTGGCCTTTTTGCTCACATGTTCTTT  
CCTGCGTTATCCCCTGATTCTGTGGATAACCGTATTACCGCCTTTGAGTGAGCTGATAC  
CGCTCGCCGCAGCCGAACGACCGAGCGCAGCGAGTCAGTGAGCGAGGAAGCGGAAG  
AGCGCCCAATACGCAAACCGCCTCTCCCCGCGCGTTGGCCGATTCATTAATGCAGCTG

GCACGACAGGTTTCCCGACTGGAAAGCGGGCAGTGAGCGCAACGCAATTAATGTGAGT  
TAGCTCACTCATTAGGCACCCCAGGCTTTACACTTTATGCTTCCGGCTCGTATGTTGTGT  
GGAATTGTGAGCGGATAACAATTTACACAGGAAACAGCTATGACCATGATTACGCCAA  
GCTTTTCGAAACGCAGAATTTTCGAGTTATTAACCTTAAAATACGCTGAAACCCGAACAT  
AGAAATATCGAATGGGAAAAAAAAACTGCATAAAAGGCATTA AAAAGAGGGACGAATTTT  
TTTTTAATAAAAATCTTAATAATCTATTA AAAAGTAAATAATAGTCTATATATACGTATATAAA  
TAAAAAATATTCAAAAAATAAAATAAACTATTATTTTAGCGTAAAGGATGGGGAAAGAGAA  
AAGAAAAAATTGATCTATCGATTTCAATTCAATTCAATTTATTTCTTTTCGGATAAGAAA  
GCAACACCTGGCAATTCCTTACCTTCCAATAATTCAAAGAAGCACCACCACCAGTAGA  
GACATGGGAGATCCCCCGCGgatc

Sequence plasmid pMB032

gatccatgctaaaataCAAACCTTTACTAAAAATCTCGAAGAACTGTGAGGCTGCTATCCTCAGA  
GCGTCTAAGACTAGATTGAACACAATCCGCGCGTACGGTTCTACCGTTCCAAAATCCAA  
GTCGTTCGAACAAGACTCAAGAAAACGCACACAGTCATGGACTGCCTTGAGAGTCGGT  
GCAATTCTAGCCGCTACTAGTTCGGTGGCGTATCTAAACTGGCATAATGGCCAAATAGA  
CAACGAGCCGAAACTGaagcttatcgataccgctgacATGTCTAAAGGTGAAGAATTATCACTGG  
TGTTGTCCCAATTTTGGTTGAATTAGATGGTGATGTTAATGGTCACAAATTTTCTGTCTCC  
GGTGAAGGTGAAGGTGATGCTACTTACGGTAAATTGACCTTAAAATTTATTTGTACTIONT  
GGTAAATTGCCAGTTCATGGCCAACCTTAGTCACTACTTTTCGGTTATGGTGTTCAATGT  
TTTGCTAGATACCCAGATCATATGAAACAACATGACTTTTTCAAGTCTGCCATGCCAGAA  
GGTTATGTTCAAGAAAGAACTATTTTTTTTCAAAGATGACGGTAACTACAAGACCAGAGCT  
GAAGTCAAGTTTGAAGGTGATACCTTAGTTAATAGAATCGAATTAAGGTATTGATTTTA  
AAGAAGATGGTAACATTTTAGGTCACAAATTGGAATACAACATAACTCTCACAAATGTTTA  
CATCATGGCTGACAAACAAAAGAATGGTATCAAAGTTAACTTCAAATTAGACACAACAT  
TGAAGATGGTCTGTTCAATTAGCTGACCATTATCAACAAAATACTCCAATTGGTGATGG  
TCCAGTCTTGTTACCAGACAACCATTACTTATCCACTCAATCTGCCTTATCCAAAGATCC  
AAACGAAAAGAGAGACCACATGGTCTTGTTAGAATTTGTTACTGCTGCTGGTATTACCCA  
TGGTATGgatgaattgtacaaaGaattCatggttcgaccattgaactgcatcgctgcccgtgccccaaatggtggattggca  
agaacggagacctaccctggcctcgctcaggaacgagttcaagtacttcaaagaatgaccacaacctctcagtggaaggta  
aacagaatctggtgattatggtaggaaaacctggttctcattcctgagaagaatcgaccttaaggacagaattaatagttct  
cagtagagaactcaaagaaccaccacgaggagctcatttctgccccaaagtttgatgatgccttaagacttattgaacaaccg  
aattggcaagtaaagtagacatggttgatagtcggaggcagttctgtttaccaggaagccatgaatcagccaggccacctcag  
actctctgacaaggatcatgcaggaattgaaagtacacgttttccagaaattgattggggaaatataaacttctccagaa  
taccaggcgtcctctctgaggtccaggaggaaaaaggcatcaagtataagttgaagtctacgagaagaagactaaGaatt  
CCGCGGGGGATCTCCCATGTCTCTACTGGTGGTGGTGCTTCTTTGGAATTATTGGAAGG  
TAAGGAATTGCCAGGTGTTGCTTTCTTATCCGAAAAGAAATAAATTGAATTGAATTGAAA  
TCGATAGATCAATTTTTTTCTTTTCTTTTCCCATCCTTTACGCTAAAATAATAGTTTATT  
TTATTTTTGAATATTTTTTATTTATATACGTATATATAGACTATTATTTACTTTTAATAGAT  
TATTAAGATTTTTATTAATAAAAAAATTCGTCCCTCTTTTAATGCCTTTTATGCAGTTTTTT  
TTTCCCATTGATATTTCTATGTTCCGGTTTCAGCGTATTTTAAGTTAATAACTCGAAAA  
TTCTGCGTTTTGAAAAGCTTGGCGTAATCATGGTCATAGCTGTTTCCTGTGTGAAATTGT  
TATCCGCTCACAATTCCACACAACATACGAGCCGGAAGCATAAAGTGTAAGCCTGGGG  
TGCTAATGAGTGAGCTAACTCACATTAATTGCGTTGCGCTCACTGCCCGCTTTCCAGT  
CGGGAAACCTGTCGTGCCAGCTGCATTAATGAATCGGCCAACGCGGGGGAGAGGGC  
GTTTGCATATTGGGCGCTCTTCCGCTTCTCGCTCACTGACTCGCTGCGCTCGGTCGTT  
CGGCTGCGGCGAGCGGTATCAGCTCACTCAAAGGCGGTAATACGGTTATCCACAGAAT

CAGGGGATAACGCAGGAAAGAACATGTGAGCAAAAGGCCAGCAAAAGGCCAGGAACC  
GTAAAAAGGCCGCGTTGCTGGCGTTTTTTCATAGGCTCCGCCCCCTGACGAGCATCA  
CAAAAATCGACGCTCAAGTCAGAGGTGGCGAAACCCGACAGGACTATAAAGATACCAG  
GCGTTTTCCCCTGGAAGCTCCCTCGTGCCTCTCCTGTTCCGACCCTGCCGTTACCG  
GATACCTGTCCGCCTTTCTCCCTTCGGGAAGCGTGGCGCTTTCTCATAGCTCACGCTGT  
AGGTATCTCAGTTCGGTGTAGGTCGTTCCGCTCCAAGCTGGGCTGTGTGCACGAACCC  
CCGTTACAGCCCGACCCTGCGCCTTATCCGGTAACTATCGTCTTGAGTCCAACCCGGT  
AAGACACGACTTATCGCCACTGGCAGCAGCCACTGGTAACAGGATTAGCAGAGCGAGG  
TATGTAGGCGGTGCTACAGAGTTCTTGAAGTGGTGGCCTAACTACGGCTACACTAGAAG  
GACAGTATTTGGTATCTGCGCTCTGCTGAAGCCAGTTACCTTCGGAAAAAGAGTTGGTA  
GCTCTTGATCCGGCAAACAAACCACCGCTGGTAGCGGTGGTTTTTTTTGTTTGCAAGCAG  
CAGATTACGCGCAGAAAAAAGGATCTCAAGAAGATCCTTTGATCTTTTCTACGGGGTC  
TGACGCTCAGTGGAACGAAAACCTCACGTTAAGGGATTTTGGTCATGAGATTATCAAAA  
GGATCTTCACCTAGATCCTTTTAAATTAATAAATGAAGTTTTAAATCAATCTAAAGTATATAT  
GAGTAACTTTGGTCTGACAGTTACCAATGCTTAATCAGTGAGGCACCTATCTCAGCGAT  
CTGTCTATTTTCGTTTCATCCATAGTTGCCTGACTCCCCGTCGTGTAGATAACTACGATACG  
GGAGGGCTTACCATCTGGCCCCAGTGCTGCAATGATACCGCGAGACCCACGCTCACCG  
GCTCCAGATTTATCAGCAATAAACCAGCCAGCCGGAAGGGCCGAGCGCAGAAGTGGTC  
CTGCAACTTTATCCGCCTCCATCCAGTCTATTAATTGTTGCCGGGAAGCTAGAGTAAGTA  
GTTCCGCAAGTAAATAGTTTGCACAACGTTGTTGCCATTGCTACAGGCATCGTGGTGTCA  
CGCTCGTCGTTTGGTATGGCTTCATTCAGCTCCGGTCCCAACGATCAAGGCGAGTTAC  
ATGATCCCCCATGTTGTGCAAAAAAGCGGTTAGCTCCTTCGGTCTCCGATCGTTGTCA  
GAAGTAAGTTGGCCGCAGTGTATCACTCATGGTTATGGCAGCACTGCATAATTCTCTTA  
CTGTCATGCCATCCGTAAGATGCTTTTCTGTGACTGGTGAGTACTCAACCAAGTCATTCT  
GAGAATAGTGTATGCGGCGACCGAGTTGCTCTTGCCCGGCGTCAATACGGGATAATAC  
CGCGCCACATAGCAGAACTTTAAAAGTGCTCATATTGGAAAACGTTCTTCGGGGCGAA  
AACTCTCAAGGATCTTACCGCTGTTGAGATCCAGTTCGATGTAACCCACTCGTGCACCC  
AACTGATCTTCAGCATCTTTACTTTTACCAGCGTTTCTGGGTGAGCAAAAACAGGAAG  
GCAAAATGCCGCAAAAAAGGGAATAAGGGCGACACGGAAATGTTGAATACTCATACTCT  
TCCTTTTTCAATATTATTGAAGCATTATCAGGGTTATTGTCTCATGAGCGGATACATATT  
TGAATGTATTTAGAAAAATAACAAATAGGGGTTCCGCGCACATTTCCCCGAAAAGTGC  
CACCTGACGTCTAAGAAACCATTATTATCATGACATTAACCTATAAAAATAGGCGTATCA  
CGAGGCCCTTTCGTCTCGCGGTTTTCGGTGATGACGGTGAAAACCTCTGACACATGCA  
GCTCCCGGAGACGGTACAGCTTGTCTGTAAGCGGATGCCGGGAGCAGACAAGCCCG  
TCAGGGCGCGTCAGCGGGTGTGGCGGGTGTGGGGGCTGGCTTAACTATGCGGCATC  
AGAGCAGATTGACTGAGAGTGCACCATATGCGGTGTGAAATACCGCACAGATGCGTAA  
GGAGAAAATACCGCATCAGGCGCCATTCGCCATTCAGGCTGCGCAACTGTTGGGAAGG



GCGATCGGTGCGGGCCTCTTCGCTATTACGCCAGCTGGCGAAAGGGGGATGTGCTGC  
AAGGCGATTAAGTTGGGTAACGCCAGGGTTTTCCAGTCACGACGTTGTAAAACGACG  
GCCAGTGAATTAATTCCACGGACTATAGACTATACTAGTATACTCCGTCTACTGTACGAT  
ACACTTCCGCTCAGGTCCTTGTCTTTAACGAGGCCTTACCACTCTTTTGTACTCTATT  
GATCCAGCTCAGCAAAGGCAGTGTGATCTAAGATTCTATCTTCGCGATGTAGTAAACT  
AGCTAGACCGAGAAAGAGACTAGAAATGCAAAGGCCTTCTACAATGGCTGCCATCAT  
TATTATCCGATGTGACGCTGCAGCTTCTCAATGATATTCGAATACGCTTTGAGGAGATAC  
AGCCTAATATCCGACAAACTGTTTTACAGATTTACGATCGTACTTGTACCCATCATTGA  
ATTTTGAACATCCGAACCTGGGAGTTTTCCCTGAAACAGATAGTATATTTGAACCTGTAT  
AATAATATATAGTCTAGCGCTTTACGGAAGACAATGTATGTATTTCCGGTTCCTGGAGAAA  
CTATTGCATCTATTGCATAGGTAATCTTGCACGTGCATCCCCGGTTCATTTTCTGCGTT  
TCCATCTTGCCTTCAATAGCATATCTTTGTTAACGAAGCATCTGTGCTTCATTTTGTAGA  
ACAAAAATGCAACGCGAGAGCGCTAATTTTTCAAACAAAGAATCTGAGCTGCATTTTAC  
AGAACAGAAATGCAACGCGAAAGCGCTATTTTACCAACGAAGAATCTGTGCTTCATTTT  
GTAAACAAAAATGCAACGCGAGAGCGCTAATTTTTCAAACAAAGAATCTGAGCTGCATT  
TTTACAGAACAGAAATGCAACGCGAGAGCGCTATTTTACCAACAAAGAATCTATACTTCT  
TTTTTGTCTACAAAAATGCATCCCGAGAGCGCTATTTTCTAACAAAGCATCTTAGATTA  
CTTTTTTCTCCTTTGTGCGCTCTATAATGCAGTCTCTTGATAACTTTTTGCACTGTAGGT  
CCGTTAAGGTTAGAAGAAGGCTACTTTGGTGTCTATTTTCTTCCATAAAAAAAGCCTG  
ACTCCACTTCCCGCGTTTACTGATTACTAGCGAAGCTGCGGGTGCATTTTTTCAAGATAA  
AGGCATCCCCGATTATATTCTATACCGATGTGGATTGCGCATACTTTGTGAACAGAAAGT  
GATAGCGTTGATGATTCTTCATTGGTCAGAAAATTATGAACGGTTTCTTATTTTTGTCTC  
TATATACTACGTATAGGAAATGTTTACATTTTCGTATTGTTTTCGATTCACTCTATGAATA  
GTTCTTACTACAATTTTTTGTCTAAAGAGTAATACTAGAGATAAACATAAAAAATGTAGA  
GGTCGAGTTTAGATGCAAGTTCAAGGAGCGAAAGGTGGATGGGTAGGTTATATAGGGA  
TATAGCACAGAGATATATAGCAAAGAGATACTTTTGTAGCAATGTTTGTGGAAGCGGTATT  
CGCAATATTTTAGTAGCTCGTTACAGTCCGGTGCCTTTTTGGTTTTTTGAAAGTGCCTCT  
TCAGAGCGCTTTTTGGTTTTCAAAGCGCTCTGAAGTTCCTATACTTTCTAGAGAATAGGA  
ACTTCGGAATAGGAACTTCAAAGCGTTTCCGAAAACGAGCGCTTCCGAAAATGCAACGC  
GAGCTGCGCACATACAGCTCACTGTTACGTGCGCACCTATATCTGCGTGTGCTGTAT  
ATATATACATGAGAAGAACGGCATAGTGCCTGTTTATGCTTAAATGCGTACTTATATG  
CGTCTATTTATGTAGGATGAAAGGTAGTCTAGTACCTCCTGTGATATTATCCCATTCCAT  
GCGGGGTATCGTATGCTTCTTCAGCACTACCCTTTAGCTGTTCTATATGCTGCCACTC  
CTCAATTGGATTAGTCTCATCCTTCAATGCTATCATTTCTTTGATATTGGATCATATGCA  
TAGTACCGAGAAACTAGTGCGAAGTAGTGATCAGGATTGCTGTTATCTGATGAGTATA  
CGTTGTCCTGGCCACGGCAGAAGCACGCTTATCGCTCCAATTTCCACAACATTAGTCA  
ACTCCGTTAGGCCCTTCATTGAAAGAAATGAGGTCATCAATGTCTTCCAATGTGAGATT

TTGGGCCATTTTTATAGCAAAGATTGAATAAGGCGCATTTTTCTTCAAAGCTTTATTGTA  
CGATCTGACTAAGTTATCTTTAATAATTGGTATTCCTGTTTATTGCTTGAAGAATTGCCG  
GTCCTATTTACTCGTTTTAGGACTGGTTCAGAATTAATTCTCATGTTTGACAGCTTATCAT  
CGATAAGCTTTTCAATTCATCTTTTTTTTTTTTTGTTCTTTTTTTGATTCCGGTTTCTTTGAA  
ATTTTTTTGATTCCGTAATCTCCGAGCAGAAGGAAGAACGAAGGAAGGAGCACAGACTT  
AGATTGGTATATATACGCATATGTGGTGTGAAGAAACATGAAATTGCCCAGTATTCTTA  
ACCCAAGTGCACAGAACAAAAACCTGCAGGAAACGAAGATAAATCATGTCGAAAGCTAC  
ATATAAGGAACGTGCTGCTACTCATCCTAGTCCTGTTGCTGCCAAGCTATTTAATATCAT  
GCACGAAAAGCAAACAACTTGTGTGCTTCATTGGATGTTTCGTACCACCAAGGAATTAC  
TGGAGTTAGTTGAAGCATTAGGTCCCAAATTTGTTTACTAAAAACACATGTGGATATCT  
TGACTGATTTTTCCATGGAGGGCACAGTTAAGCCGCTAAAGGCATTATCCGCCAAGTAC  
AATTTTTTACTCTTTCGAAGACAGAAAATTTGCTGACATTGGTAATACAGTCAAATTGCAGT  
ACTCTGCGGGTGTATACAGAATAGCAGAATGGGCAGACATTACGAATGCACACGGTGT  
GGTGGGCCCAGGTATTGTTAGCGTTTTGAAGCAGGCGGCGGAAGAAGTAACAAAGGAA  
CCTAGAGGCCTTTTGATGTTAGCAGAATTGTCATGCAAGGGCTCCCTATCTACTGGAGA  
ATATACTAAGGGTACTGTTGACATTGCGAAGAGCGACAAAGATTTTGTATCGGCTTTAT  
TGCTCAAAGAGACATGGGTGGAAGAGATGAAGGTTACGATTGGTTGATTATGACACCCG  
GTGTGGGTTTAGATGACAAGGGAGACGCATTGGGTCAACAGTATAGAACCGTGGATGA  
TGTGGTCTCTACAGGATCTGACATTATTATTGTTGGAAGAGGACTATTTGCAAAGGGAA  
GGGATGCTAAGGTAGAGGGTGAACGTTACAGAAAAGCAGGCTGGGAAGCATATTTGAG  
AAGATGCGGCCAGCAAACTAAAAACTGTATTATAAGTAAATGCATGTATACTAAACTC  
ACAAATTAGAGCTTCAATTTAATTATATCAGTTATTACCCCTTAGCCTAAAAAACCTTCT  
CTTTGGAACTTTCAGTAATACGCTTAACTGCTCATTGCTATATTGAAGTACGGATTAGAA  
GCCGCCGAGCGGGTACAGCCCTCCGAAGGAAGACTCTCCTCCGTGCGTCTCGTCTT  
CACCGGTCGCGTTCCTGAAACGCAGATGTGCCTCGCGCCGCACTGCTCCGAACAATAA  
AGATTCTACAATACTAGCTTTTATGGTTATGAAGAGGAAAAATTGGCAGTAACCTGGCCC  
CACAAACCTTCAAATGAACGAATCAAATTAACAACCATAGGATGATAATGCGATTAGTTT  
TTAGCCTTATTTCTGGGGTAATTAATCAGCGAAGCGATGATTTTTGATCCTCGAGCCGC  
TCGAGCGCTCGAGCAGATCCGCCAGGCGTGTATATAGCGTGGATGGCCAGGCAACTTT  
AGTGCTGACACATACAGGCATATATATATGTGTGCGACGACACATGATCATATGGCATG  
CATGTGCTCTGTATGTATATAAACTCTTGTTTTCTTTTTCTCTAAATATTCTTTCTTA  
TACATTAGGTCTTTGTAGCATAAATACTATACTTCTATAGACACGCAACACAAATACA  
CACACTAAATTAATAATGACCG

Sequence plasmid pMB034

tcgcgcttccggtgatgacggtgaaaacctctgacacatgcagctcccggagacggtcacagcttctgtgaagcggatgccgg  
gagcagacaagcccgtcagggcgcgtcagcgggtgtggcgggtgtcggggctgcttaactatcggcatcagagcagattgt  
actgagagtgaccataaacgacattactatataataataggaagcatttaatagacagcatcgaatataatgtgtactttgcag  
ttatgacgccagatggcagtagtgaagatattctttatgaaaaatagctgtcacctacgtacaatcttgatccggagcttttctttt  
tgccgattaagaattaattcggctgaaaaaagaaaaggagagggccaagagggaggcattggtgactattgagcacgtgagt  
atacgtgattaagcacacaaaggcagcttgagtagtctgttattaatttcacaggtagtctggtccattggtgaaagtttgcggctt  
gcagagcacagaggccgcagaatgtgctctagattccgatgctgacttctgggtattatagtgtgcccaatagaaagagaaca  
attgacccggttattgcaaggaaaattcaagtcttgaaaagcatataaaaaatagttcaggcactccgaaatacttggttgcggtgt  
tcgtaatcaacctaaggaggatgtttggctctggtcaatgattacggcattgatcgtccaactgcatggagatgagcgtggcaa  
gaataccaagagttcctcggtttccagttataaaagactcgtatttccaaaagactgcaacatactactcagtgacgcttcacag  
aaacctcattcgtttattccctgtttgattcagaagcaggtgggacaggtgaacttttgattggaactcgatttctgactgggttgaa  
ggcaagagagccccgaaagcttaccatttatgttagctggtgactgacgccagaaaatgttggtgatgcgcttagattaaatggc  
gttattggtgtgatgtaagcggaggtgtggagacaaatggtgtaaagacttaacaaaatagcaaattcgtcaaaaatgctaa  
gaaataggttattactgagtagtattttaaagtattgttgcacttgcctgcggtgtgaaataccgcacagatgcgtaaggagaa  
aataccgcatcaggaaattgtaaacttaataattttgtaaaattcgcgttaaattttgttaaatacagctcatttttaaccaataggccg  
aaatcggcaaaatccctataatacaaaagaatagaccgagataggggtgagtggttccagtttgaacaagagtcactatta  
aagaactggactccaactgcaaaaggcgaaaaaccgtctatcagggcgatggcccactacgtgaaccatcacctaataca  
gtttttggggtcgaggtgccgtaaagcactaaatcggaaccctaaagggagccccgatttagagcttgcaggggaaagccgg  
cgaactggtgcgagaaaggaaggaagaaagcgaaggagcggcgctagggcgctggcaagtgtagcggtcacgctgcg  
cgtaaccaccacaccgccgcttaatgcgcccgtacagggcgctgcgccattcgccattcaggctgcgcaactgttggga  
agggcgatcgggtcgggctcttcgctattaccgagctggcgaaggggggatgtgctgcaaggcgattaagttgggtaacgcc  
agggtttcccagtcacgacgttgaaaacgacggccagtgaaatgtaatacgcactactatagggcgaattggagctctcagttc  
agttatcattatcaatactgccatttcaaagaatacgtaaataattaatagtagtgatttcttaactttattagtcaaaaaattagcctt  
ttaattctgctgaacccgtacatgccaaaatagggggcgggttacacagaatataaacatcgtaggtgtctgggtgaacagttt  
attcctggcatccactaaataatggagcccgttttaagctggcatccagaaaaaaaagaatcccagcaccaaaaatattgttt  
tcttccaacatcagttcataggtcattctcttagcgcaactacagagaacaggggcacaaacaggcaaaaaacgggcac  
aacctcaatggagtgatgcaacctgctggagtaaatgatgacacaaggcaattgaccacgcatgtatctatctcattttctaca  
ccttctattaccttctgctctctgatttgaaaaagctgaaaaaaaaggtgaaaccagttccctgaaattattcccctacttgacta  
ataagtataaaagacggtaggtattgattgtaattctgtaaatctatttctaaactttaaattctactttatagttagcttttttagttt  
aaaacaccaagaacttagtttgaataaacacacataaacaacaaatctagaactagtgatccccgggctgcaggaattc  
gatatacagcttatcgatgtgagcaagggcgaggaGGATAACATGGCCATCATCAAGGAGTTCATGCGC  
TTCAAGGTGCACATGGAGGGCTCCGTGAACGGCCACGAGTTCGAGATCGAGGGCGAG  
GGCGAGGGCCGCCCTACGAGGGCACCCAGACCGCCAAGCTGAAGGTGACCAAGGGT  
GGCCCCCTGCCCTTCGCCTGGGACATCCTGTCCCCTCAGTTCATGTACGGCTCCAAGG  
CCTACGTGAAGCACCCCGCCGACATCCCCGACTACTTGAAGCTGTCTTCCCCGAGGG

CTTCAAGTGGGAGCGCGTGATGAACTTCGAGGACGGCGGCGTGGTGACCGTGACCCA  
GGACTCCTCCCTGCAGGACGGCGAGTTCATCTACAAGGTGAAGCTGCGCGGCACCAAC  
TTCCCCTCCGACGGCCCCGTAATGCAGAAGAAGACCATGGGCTGGGAGGCCTCCTCC  
GAGCGGATGTACCCCGAGGACGGCGCCCTGAAGGGCGAGATCAAGCAGAGGCTGAAG  
CTGAAGGACGGCGGCCACTACGACGCTGAGGTCAAGACCACCTACAAGGCCAAGAAG  
CCCGTGCAGCTGCCCGGCGCCTACAACGTCAACATCAAGTTGGACATCACCTCCCACA  
ACGAGGACTACACCATCGTGGAACAGTACGAACGCGCCGAGGGCCGCCACTCCACCG  
GCGGCATGGacgagctgtacaagtagctcgagTcatgtaaTTAGTTATGTACGCTTACATTACGCC  
CTCCTCCCACATCCGCTCTAACCGAAAAGGAAGGAGTTAGACAACCTGAAGTCTAGGTC  
CCTATTTATTTTTTTAATAGTTATGTTAGTATTAAGAACGTTATTTATATTTCAAATTTTTT  
TTTTTTTTCTGTACAAACGCGTGTACGCATGTAACATTATACTGAAAACCTTGCTTGAGAA  
GGTTTTGGGACGCTCGggtaccagctttgtcccttagtgagggttaattccgagcttggcgtaatcatggtcatagct  
gttccctgtgaaattgtatccgctcacaattccacacaacataggagccggaagcataaagtgtaaagcctggggtgcctaatg  
agtgaggtaaactcacattaattgctgtgcgctcactgcccgttccagtcgggaaacctgctgctgagctgcattaatgaatcggc  
caacgcgcggggagagggcgttgcgtattggcgctctccgctcctcgtcactgactcgtcgtcgctcggtcgtcggctcggg  
cgagcggatcagctcactcaaaggcgtaatacggftatccacagaatcaggggataacgcaggaaagaacatgtgagcaa  
aaggccagcaaaaggccaggaacctgaaaaaggccgcttgcgtggcgttttccataggctcggccccctgacgagcatcac  
aaaaatcgacgctcaagtcagaggtggcgaaccgacaggactataaagataccaggcgtccccctggaagctccctcgt  
gcgctcctcgttccgaccctgccgctaccggatacctgtccgcttctccctcgggaagcgtggcgttctcaatgctcacgctg  
taggtatctcagttcgggtgtaggtcgtcgaagctgggctgtgtgcacgaacccccgttcagcccaccgctgcgcttacc  
ggtaactatcgtcttgagccaaccggtgaagacacgacttatcgccactggcagcagccactggtaacaggattagcagagcg  
aggtatgtagggcgtctacagagttctgaagtggcctaactacggctacactagaaggacagtagttggtatctcgcgctcgt  
ctgaagccagttacctcggaaaaagagttggtagctcttgatccggcaaaaaccaccgctggtagcgggtggtttttgttgca  
agcagcagattacgcgcaaaaaaaggatctcaagaagatcctttgatctttctacggggtctgacgctcagtggaacgaaa  
actcacgtaagggtttgtcatgagattataaaaaggatctcacctagatccttttaattaaaaatgaagtttaaatcaatct  
aaagtataatagtaaaacttggtctgacagttaccaatgcttaacagtgaggcacctatctcagcagatctgtctatctcgttcatccat  
agttgcctgactgcccgtcgtgtagataactacgatacgggagggcttaccatctggccccagtgctgcaatgataccgagagac  
ccacgctcaccggctccagattatcagcaataaaccagccagccggaagggccgagcgcagaagtggtcctgcaactttatc  
cgctccatccagcttattaattgttgccgggaagctagagtaagtagttcgccagtaatagtttgcgcaacgttgtgcaattgctac  
agggatcgtgggtgcacgctcgtcgtttggatggcttattcagctccggttccaacgatcaaggcgagttacatgatccccatgt  
tgtgaaaaaagcggtagctcctcgtcctccgatcgttgcagaagtaagttggccgagtggtatcactcatggttatggcagc  
actgcataattctctactgtcatgccatccgtaagatgctttctgtgactggtgagtactcaaccaagtcattctgagaatagtgtatg  
cggcgaccgagttgctcttgcccggcgtcaatacgggataataaccgcccacatagcagaactttaaagtgctcatcattggaa  
aacgttctcggggcgaactcctcaaggatctaccgctgttgatccagttcagatgaaccactcgtgcacccaactgatctc  
agcatctttactttaccagcgtttctgggtgagcaaaaacaggaaggcaaaatgccgcaaaaaagggaataagggcgacac  
ggaaatgtgaatactcactcttctttcaatattatgaagcatttatcaggggtattgtctcatgagcggatacatattgaatgtat  
ttagaaaaataaacaataggggttccgcgcacattccccgaaaagtgccacctgggtcctttcatcacgtgctataaaaaaat

tataatttaaatttttaataataatataaattaaaaatagaaagtaaaaaagaattaaagaaaaatagttttgtttccgaag  
atgtaaagactctagggggatcgccaacaatactacctttatcttgctctcctgctctcaggtattaatgccgaattgttcatctg  
tctgtgtagaagaccacacgaaaatcctgtgattttactttacttatcgtaaatcgaatgtatatcttfaatctgcttttctgtctaa  
taaataatatagtaaagtagctttttgtgaaatttttaaacctttgtttttttttctcattccgtaactctctaccttcttattactttcta  
aatccaaatacaaaacataaaaaataaataaacacagagtaaatcccaaattattccatcattaaaagatacgaggcgctgt  
aagttacaggcaagcgatccgtcctaagaaaccattattatcatgacattaacctataaaaaataggcgtatcacgaggccctttcgt

c
